# Supplementary material
Source: publisher figshare collection journal article supplement (https://gsapubs.figshare.com/ndownloader/files/22411281)

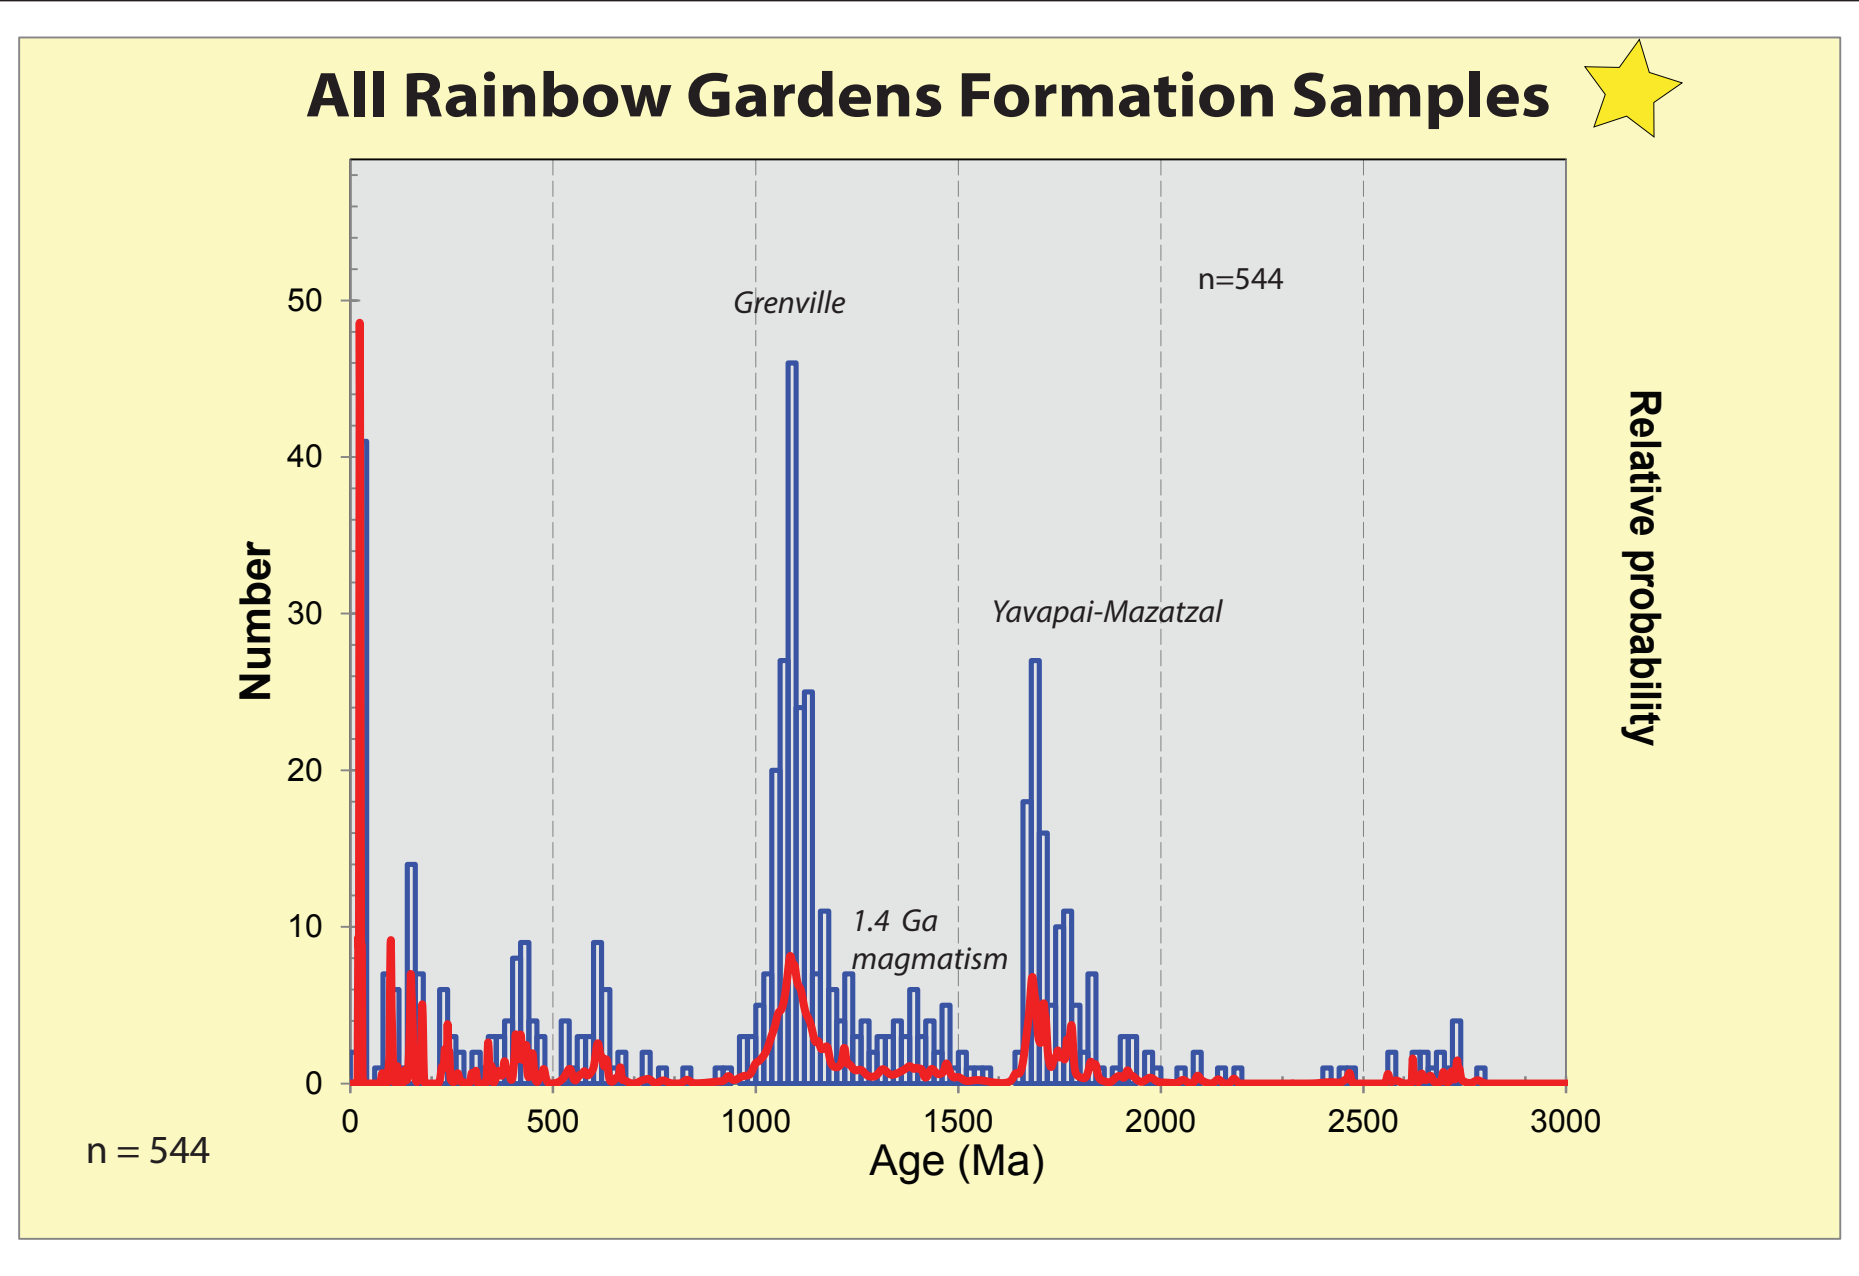

*North of the Paleoscarp*

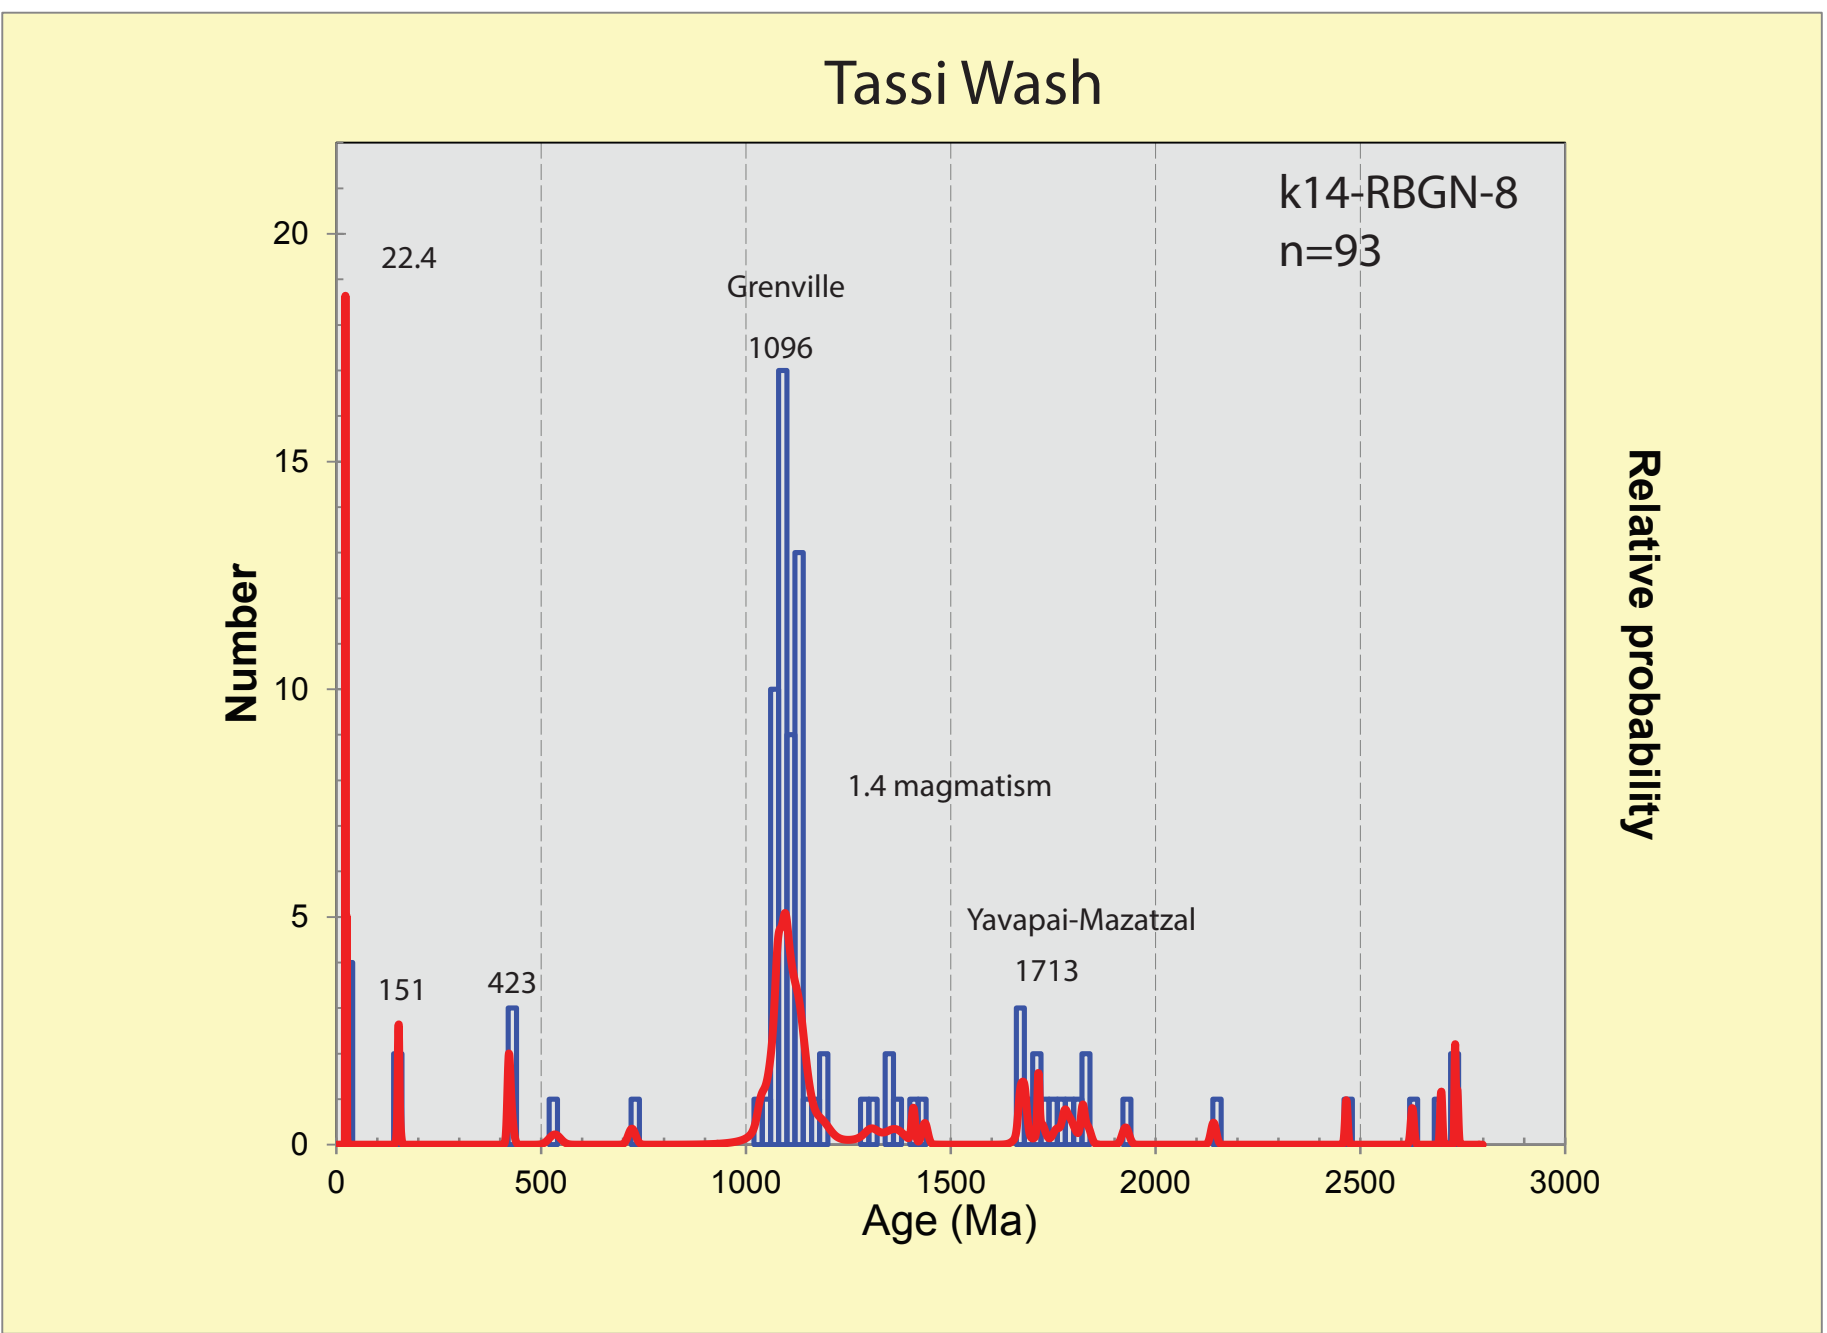

youngest

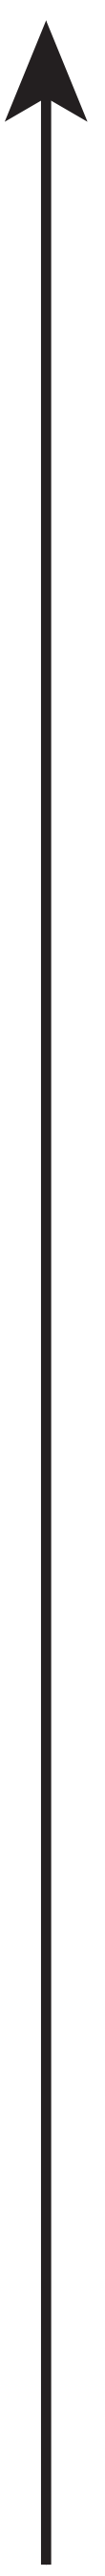

oldest

*South of the Paleoscarp*

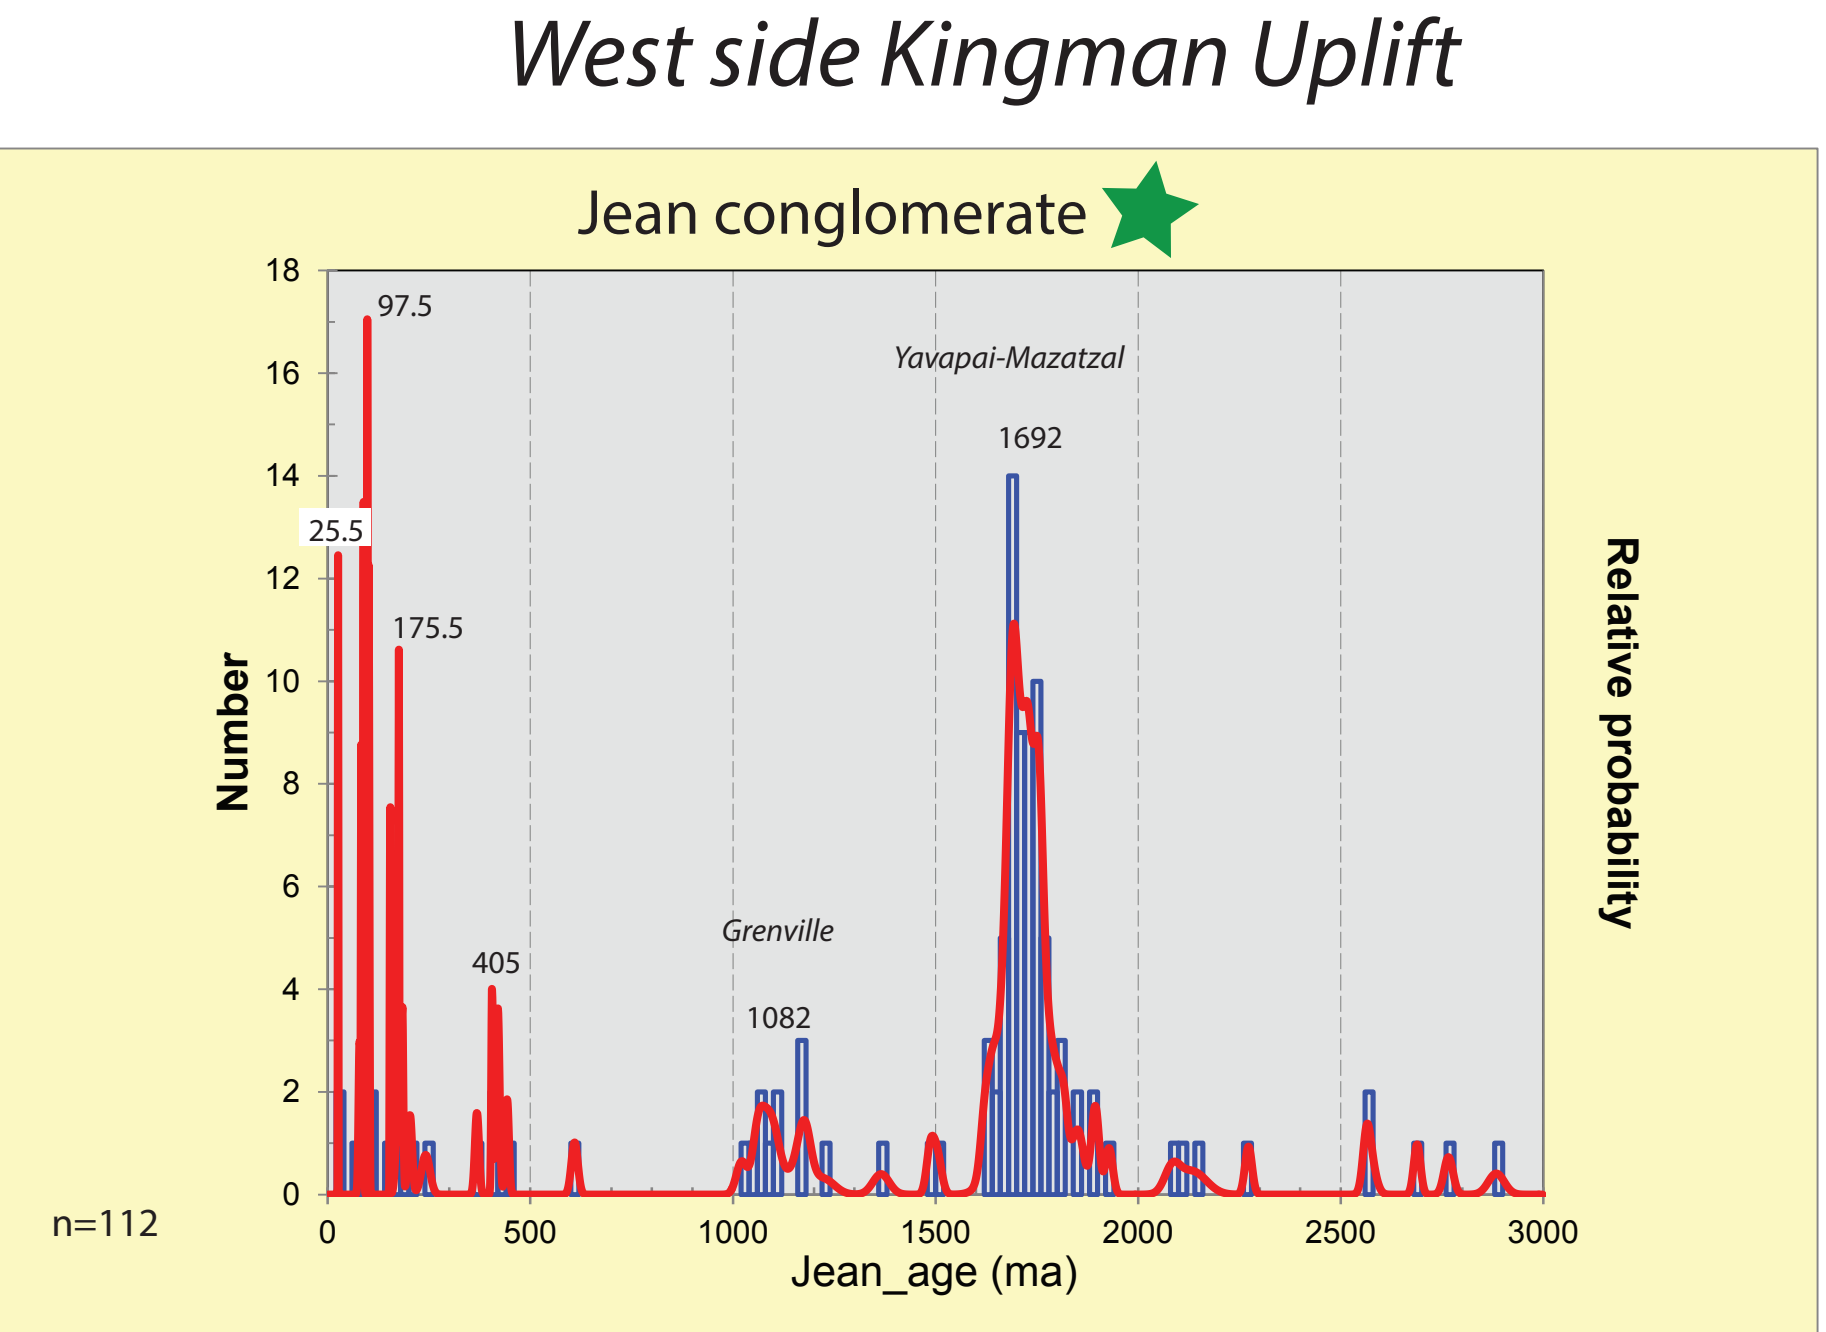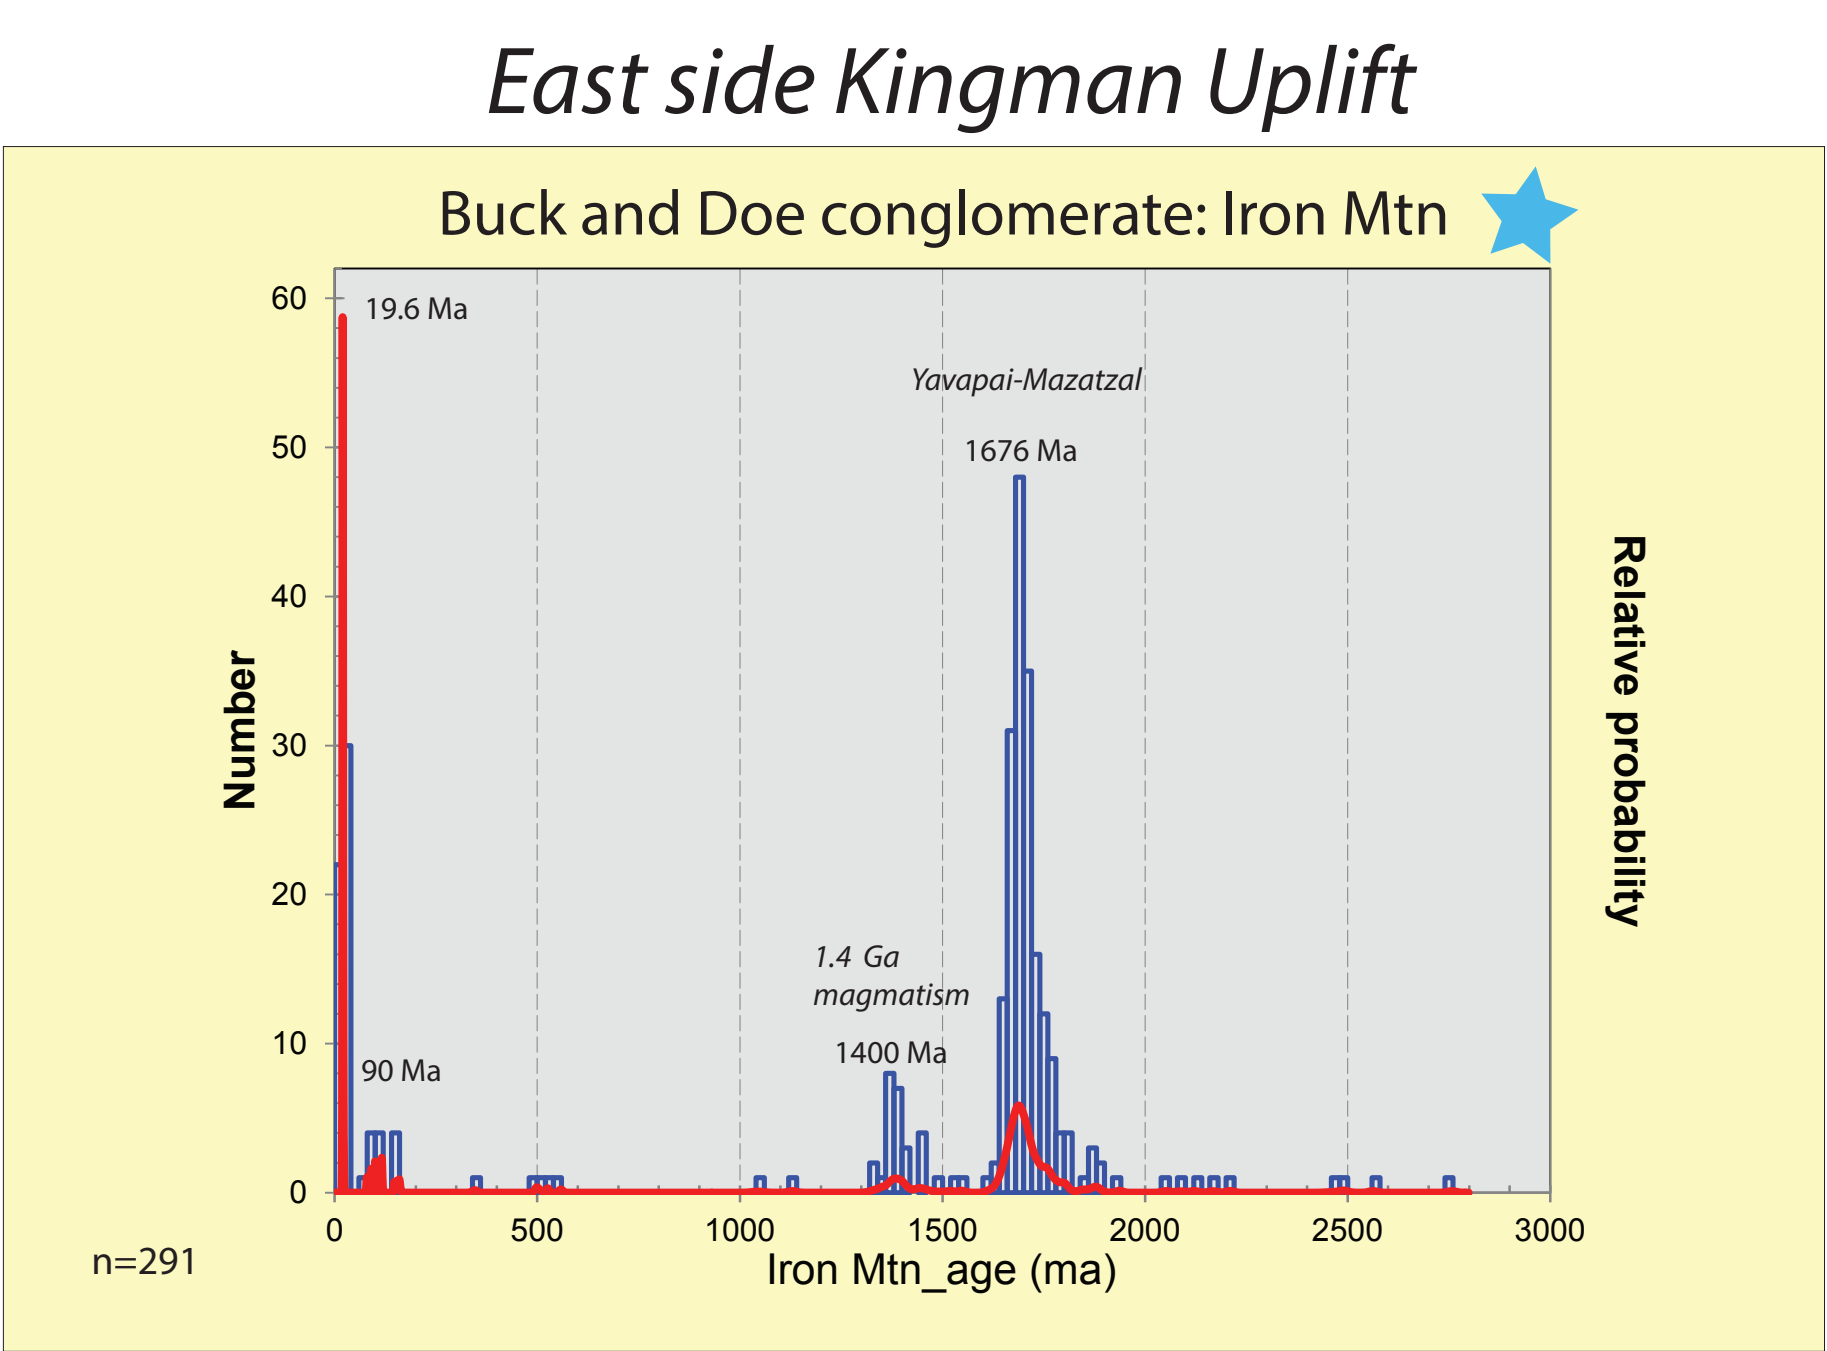

*Southeast side Kingman Uplift*

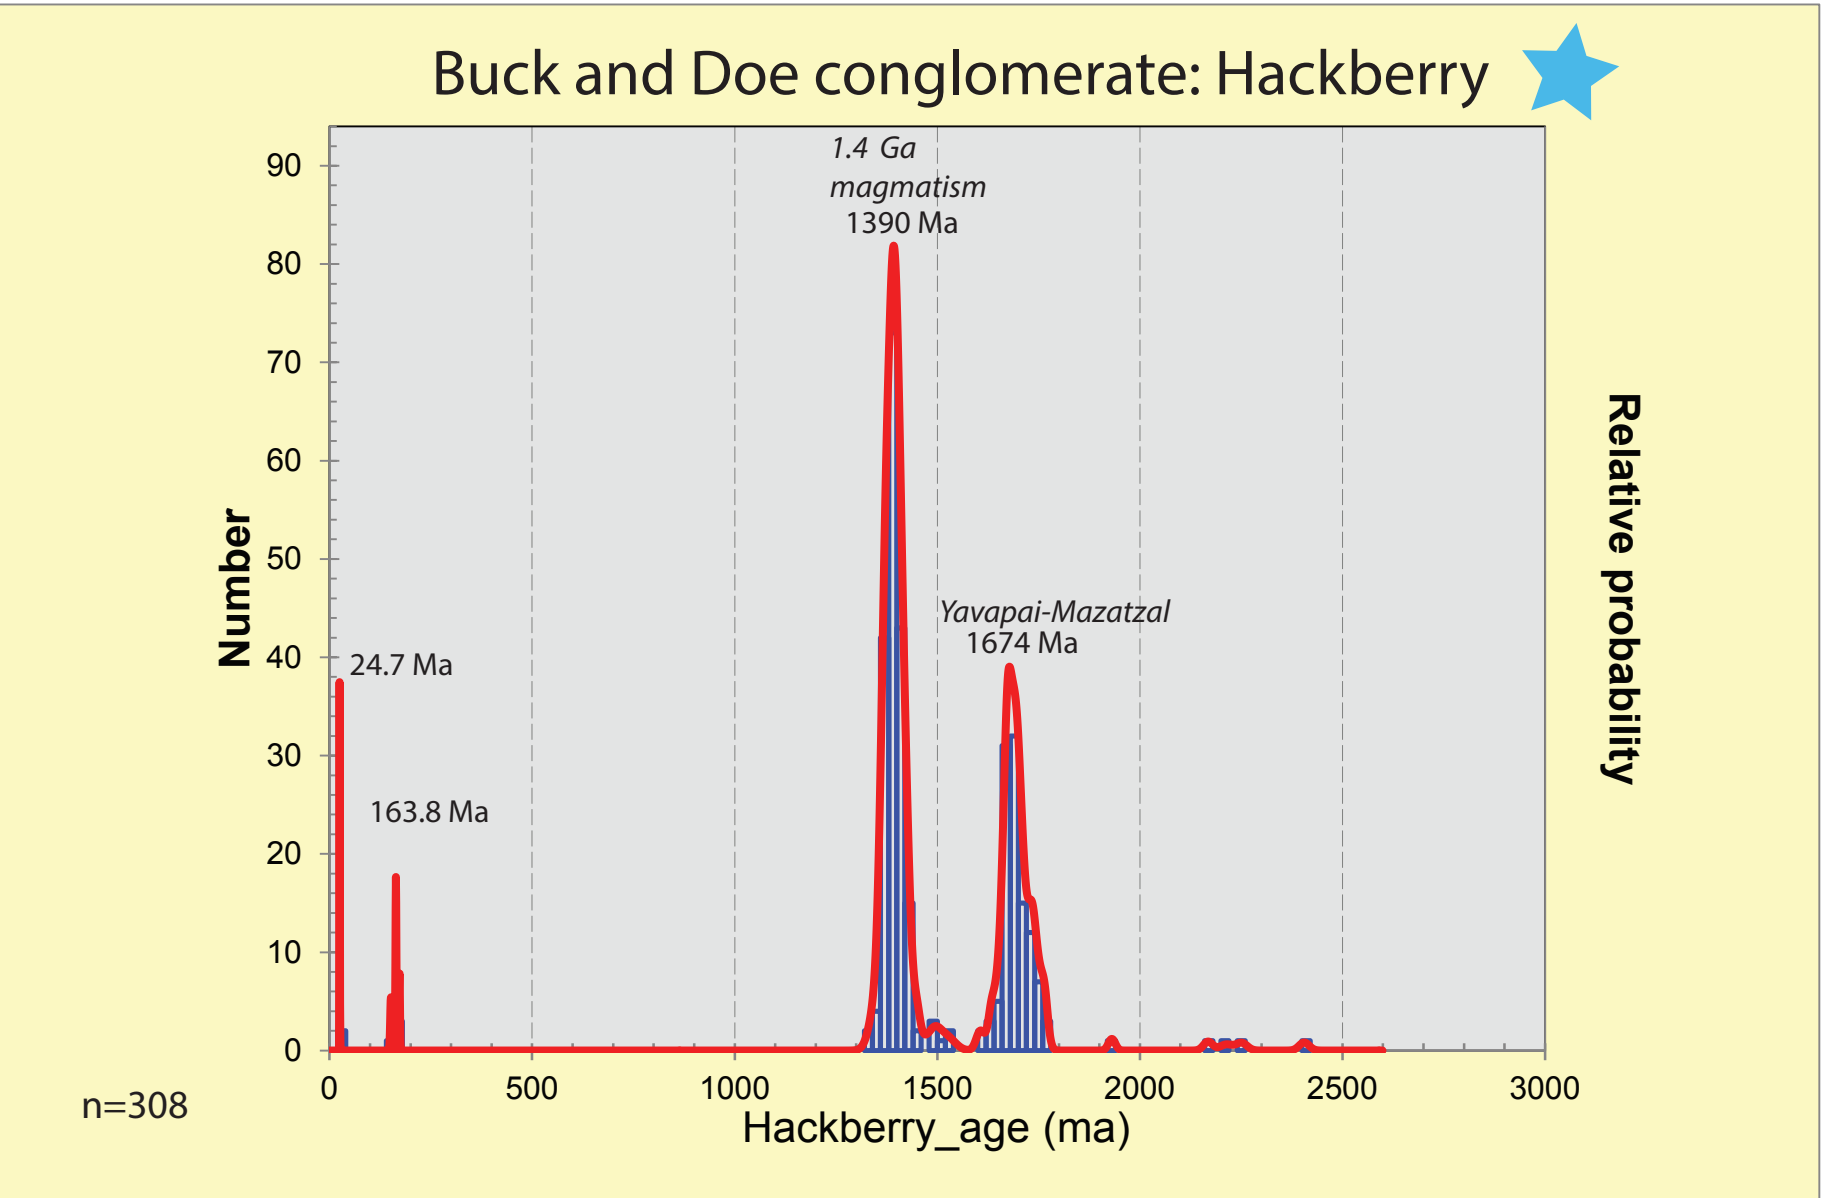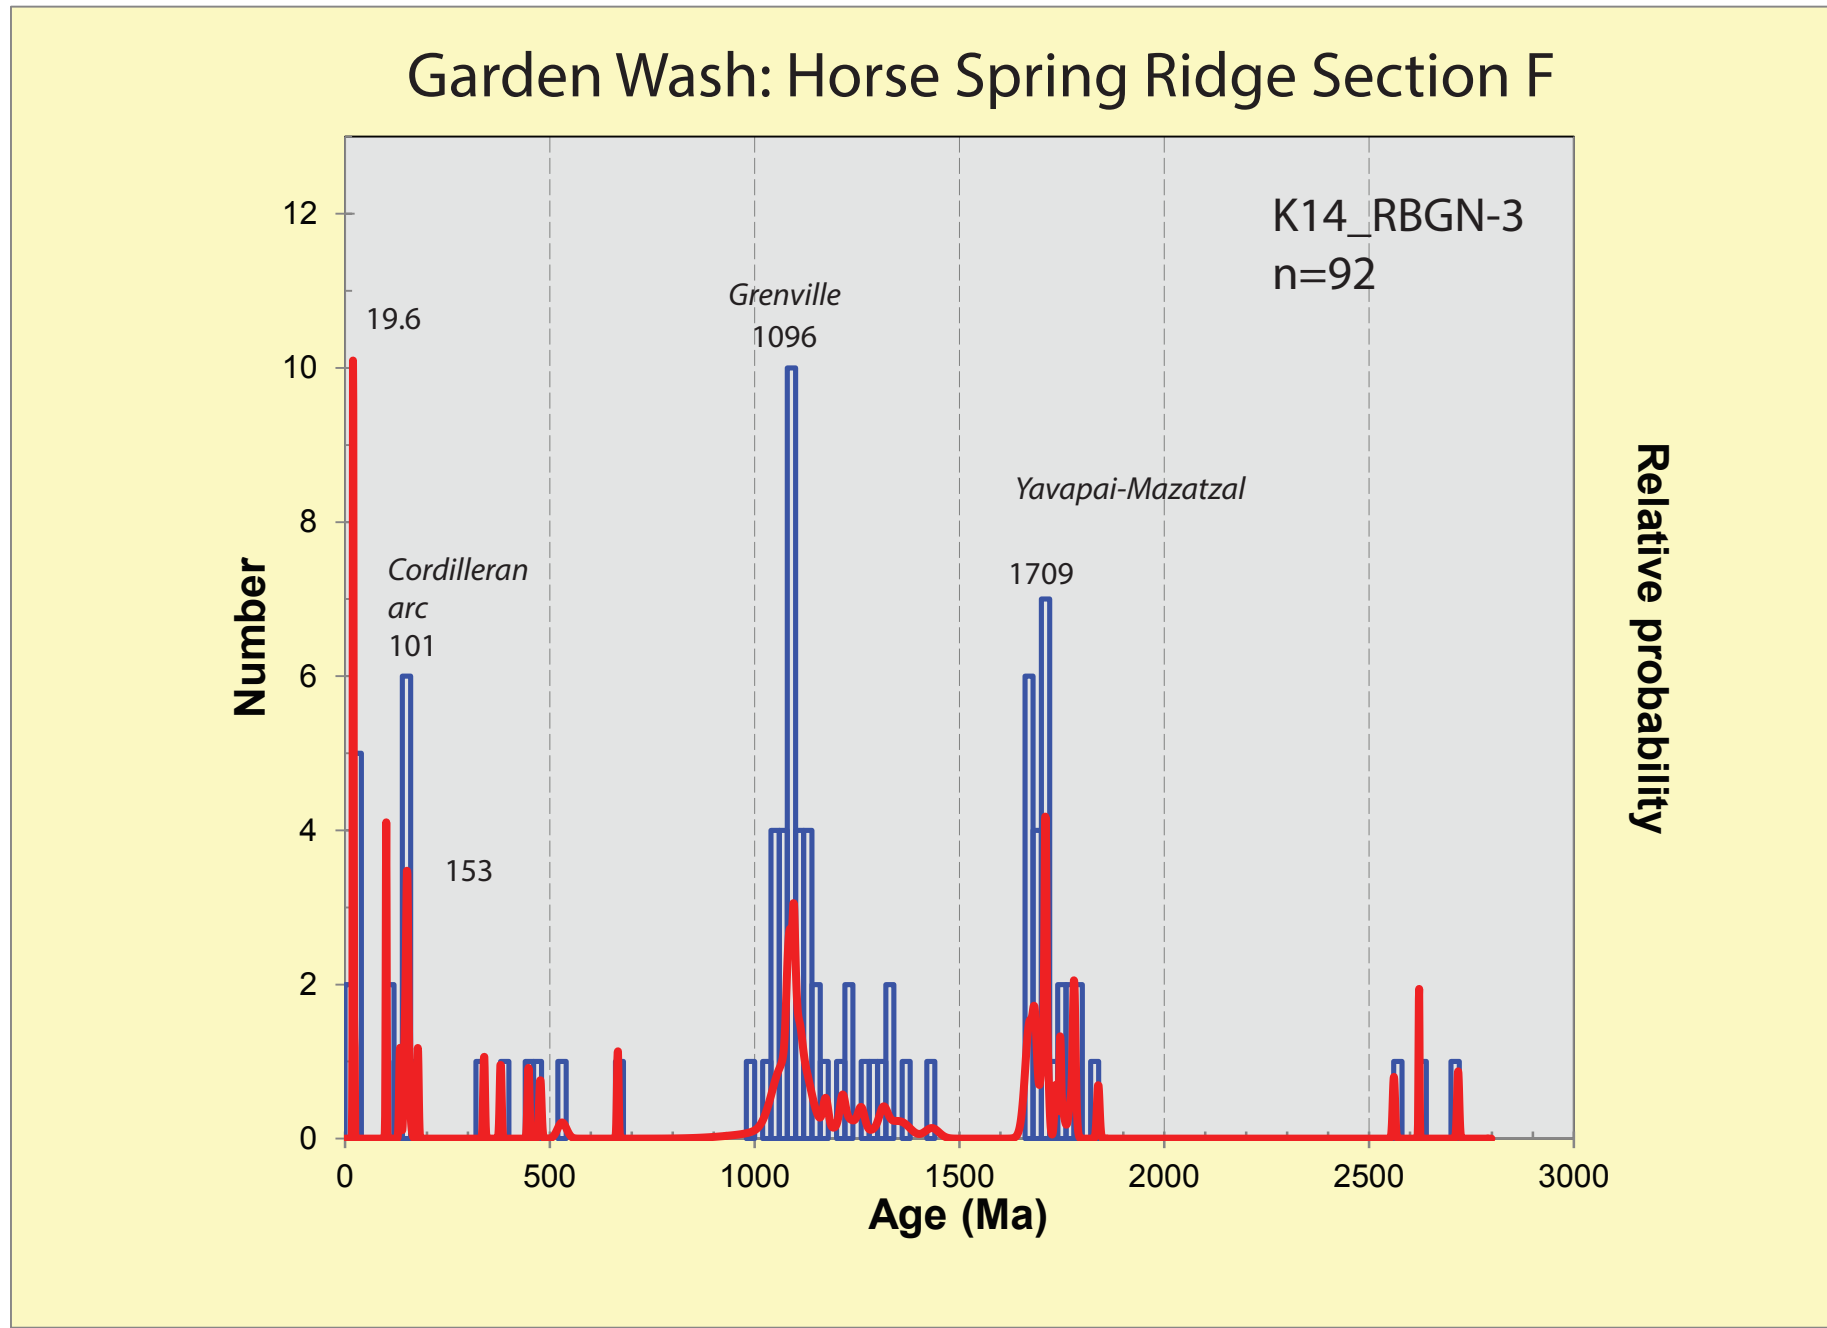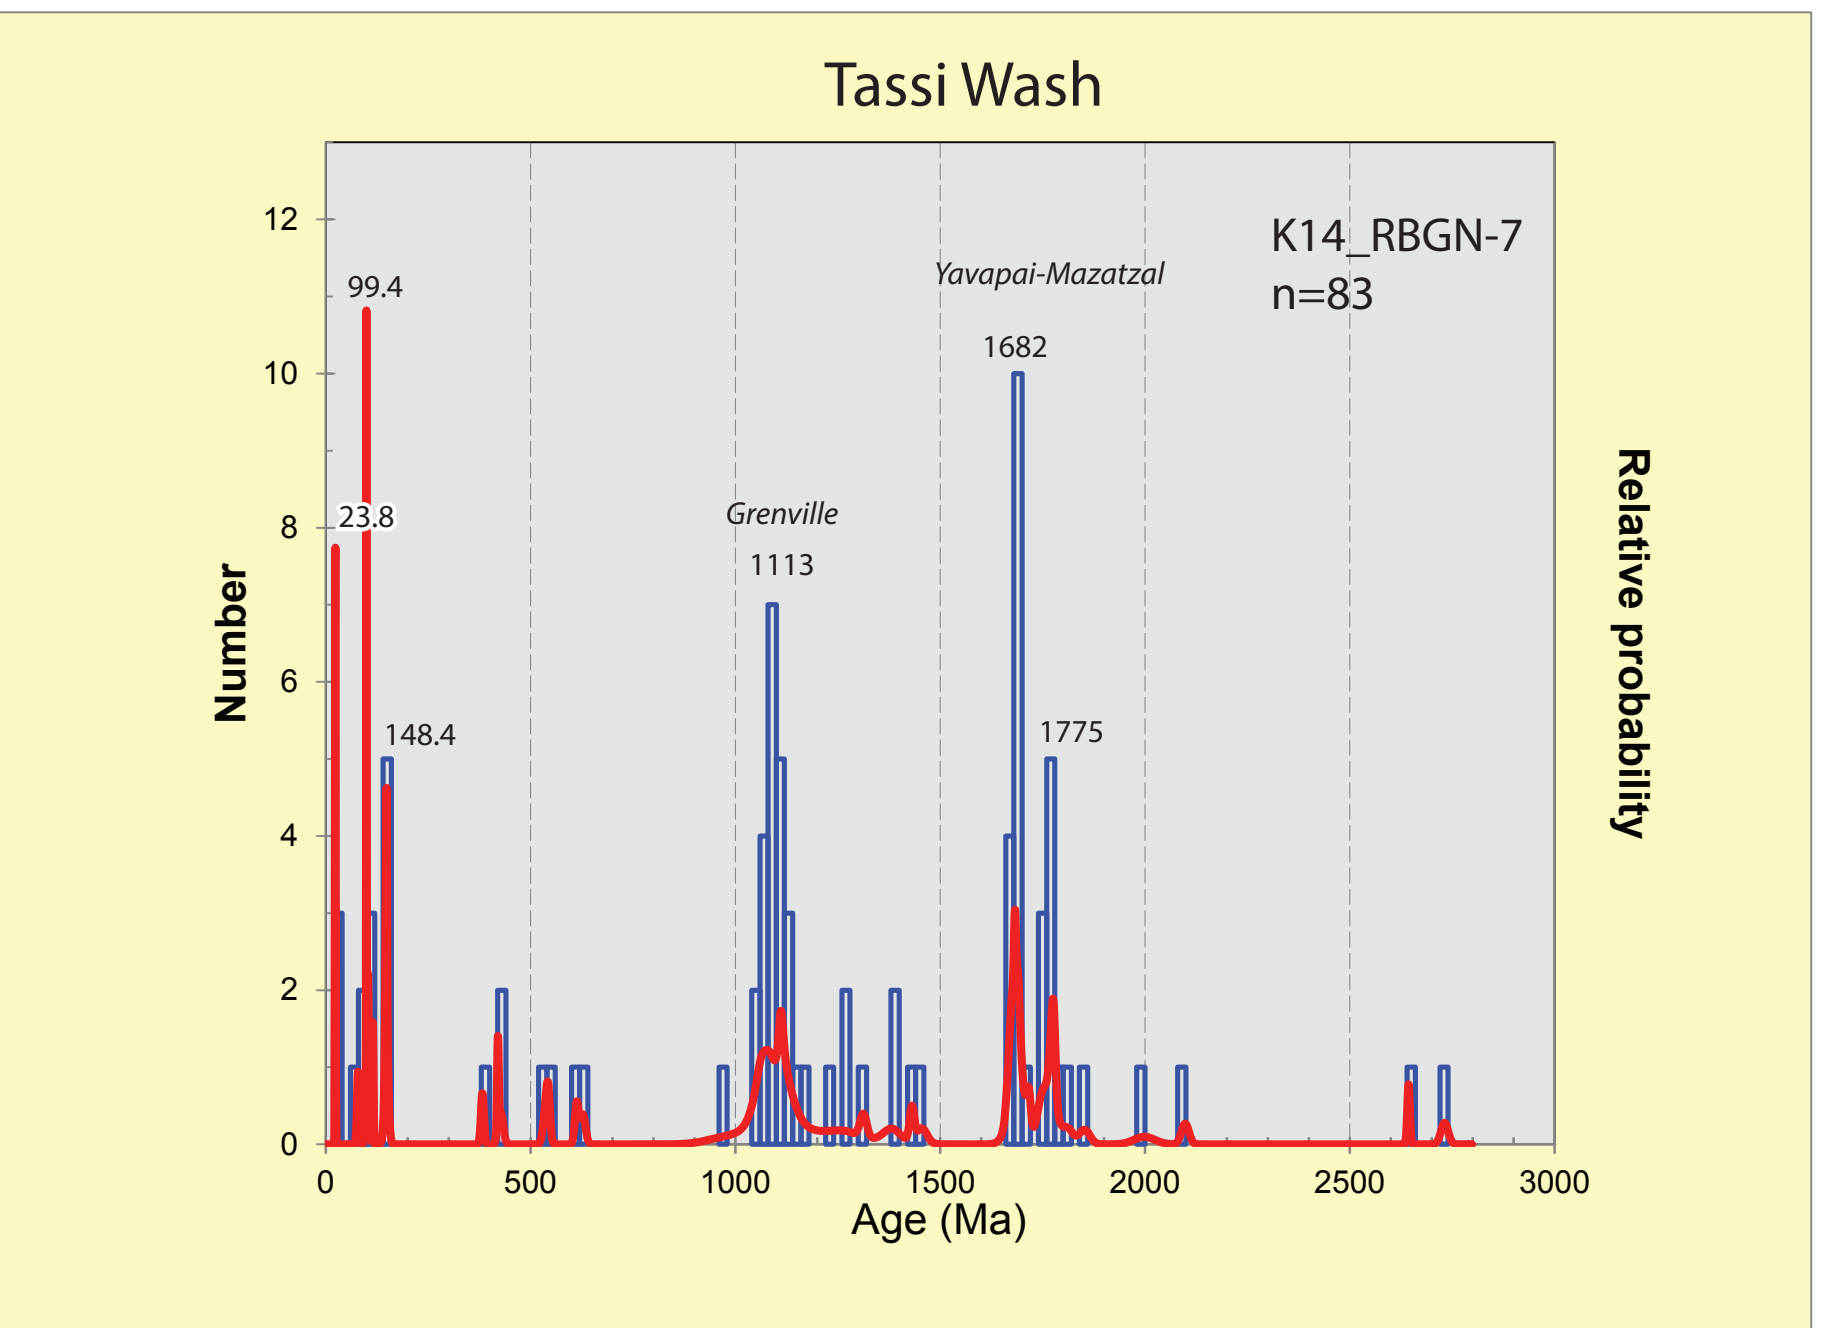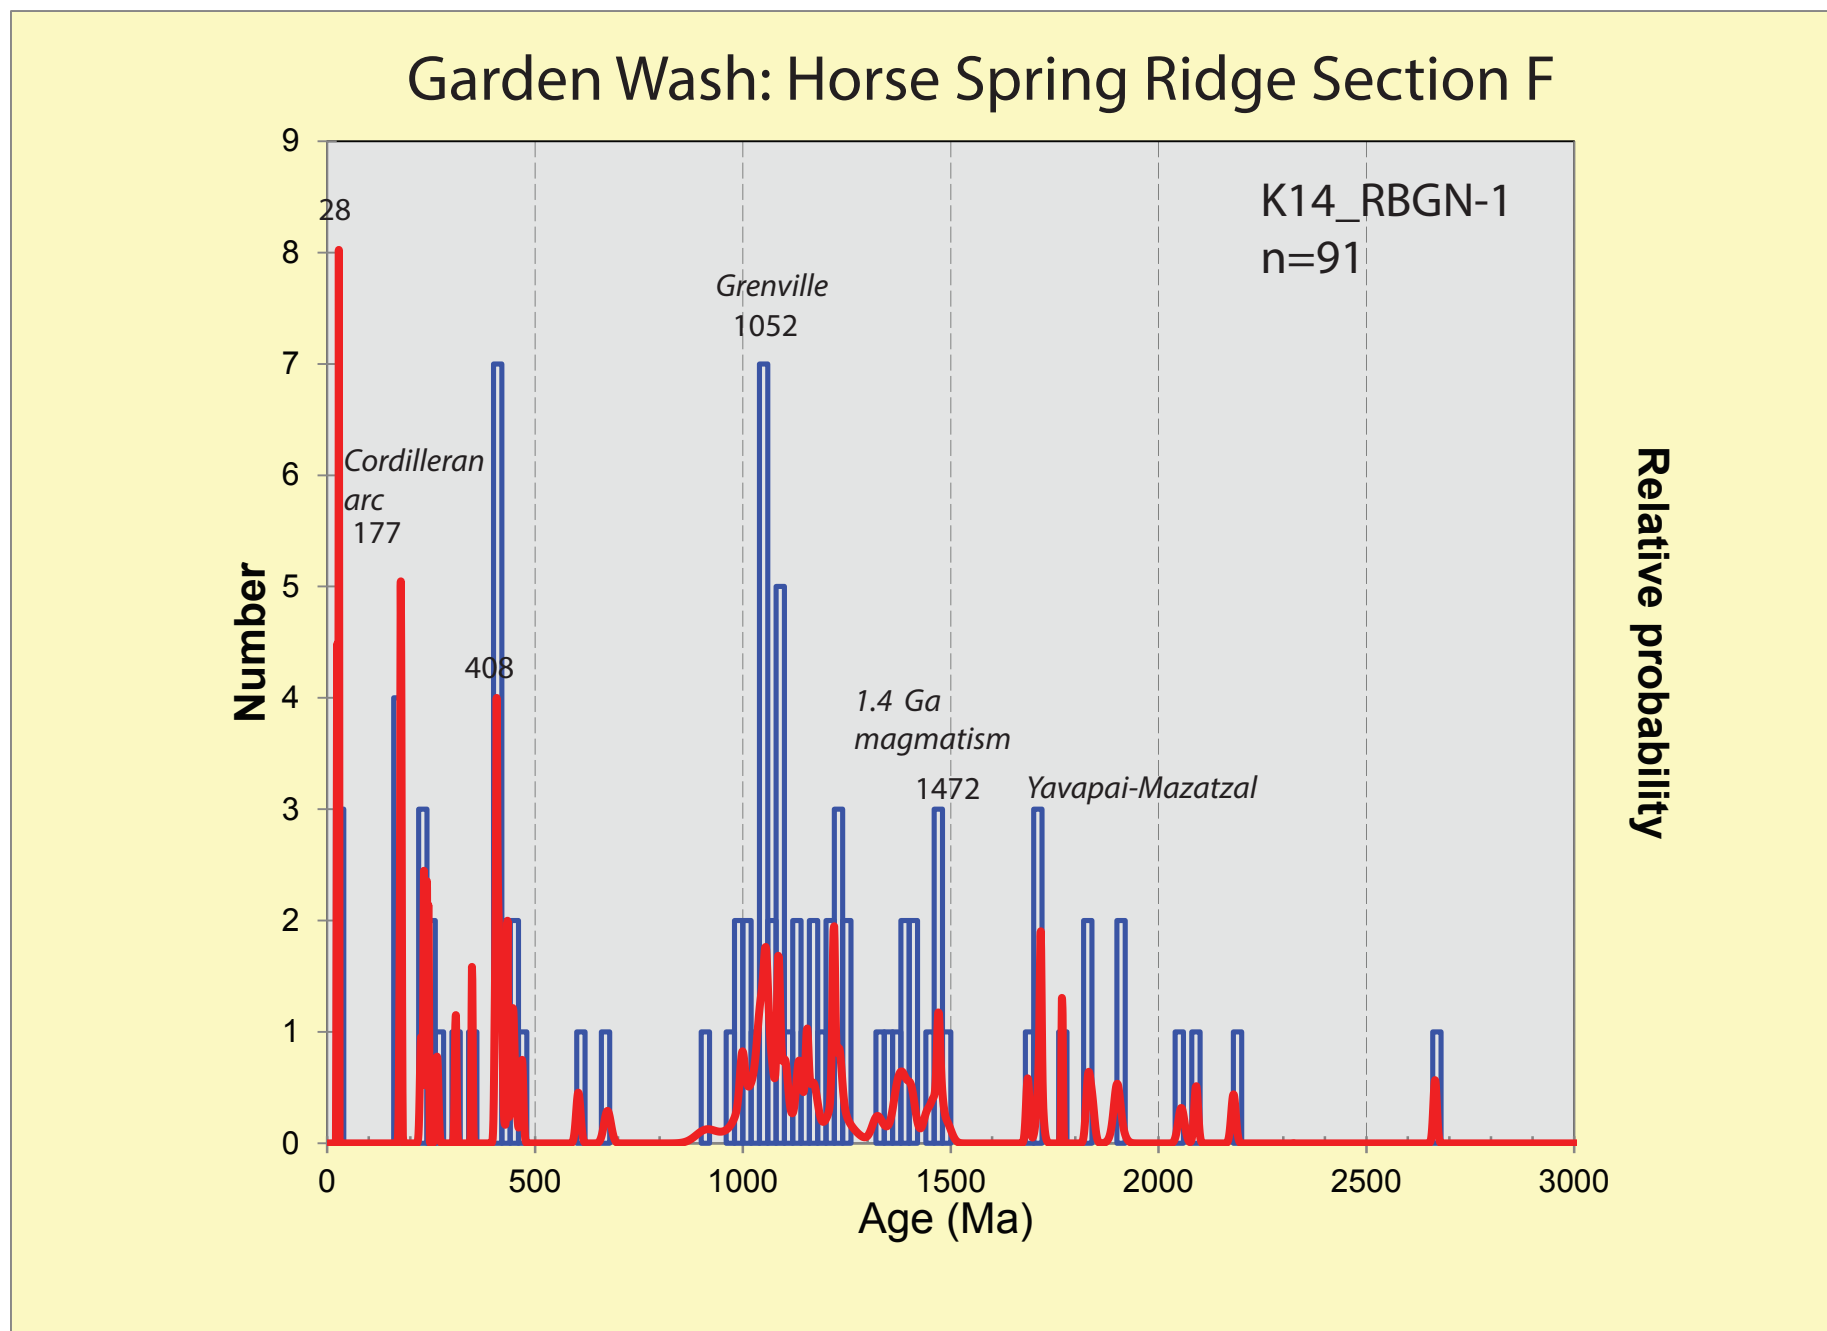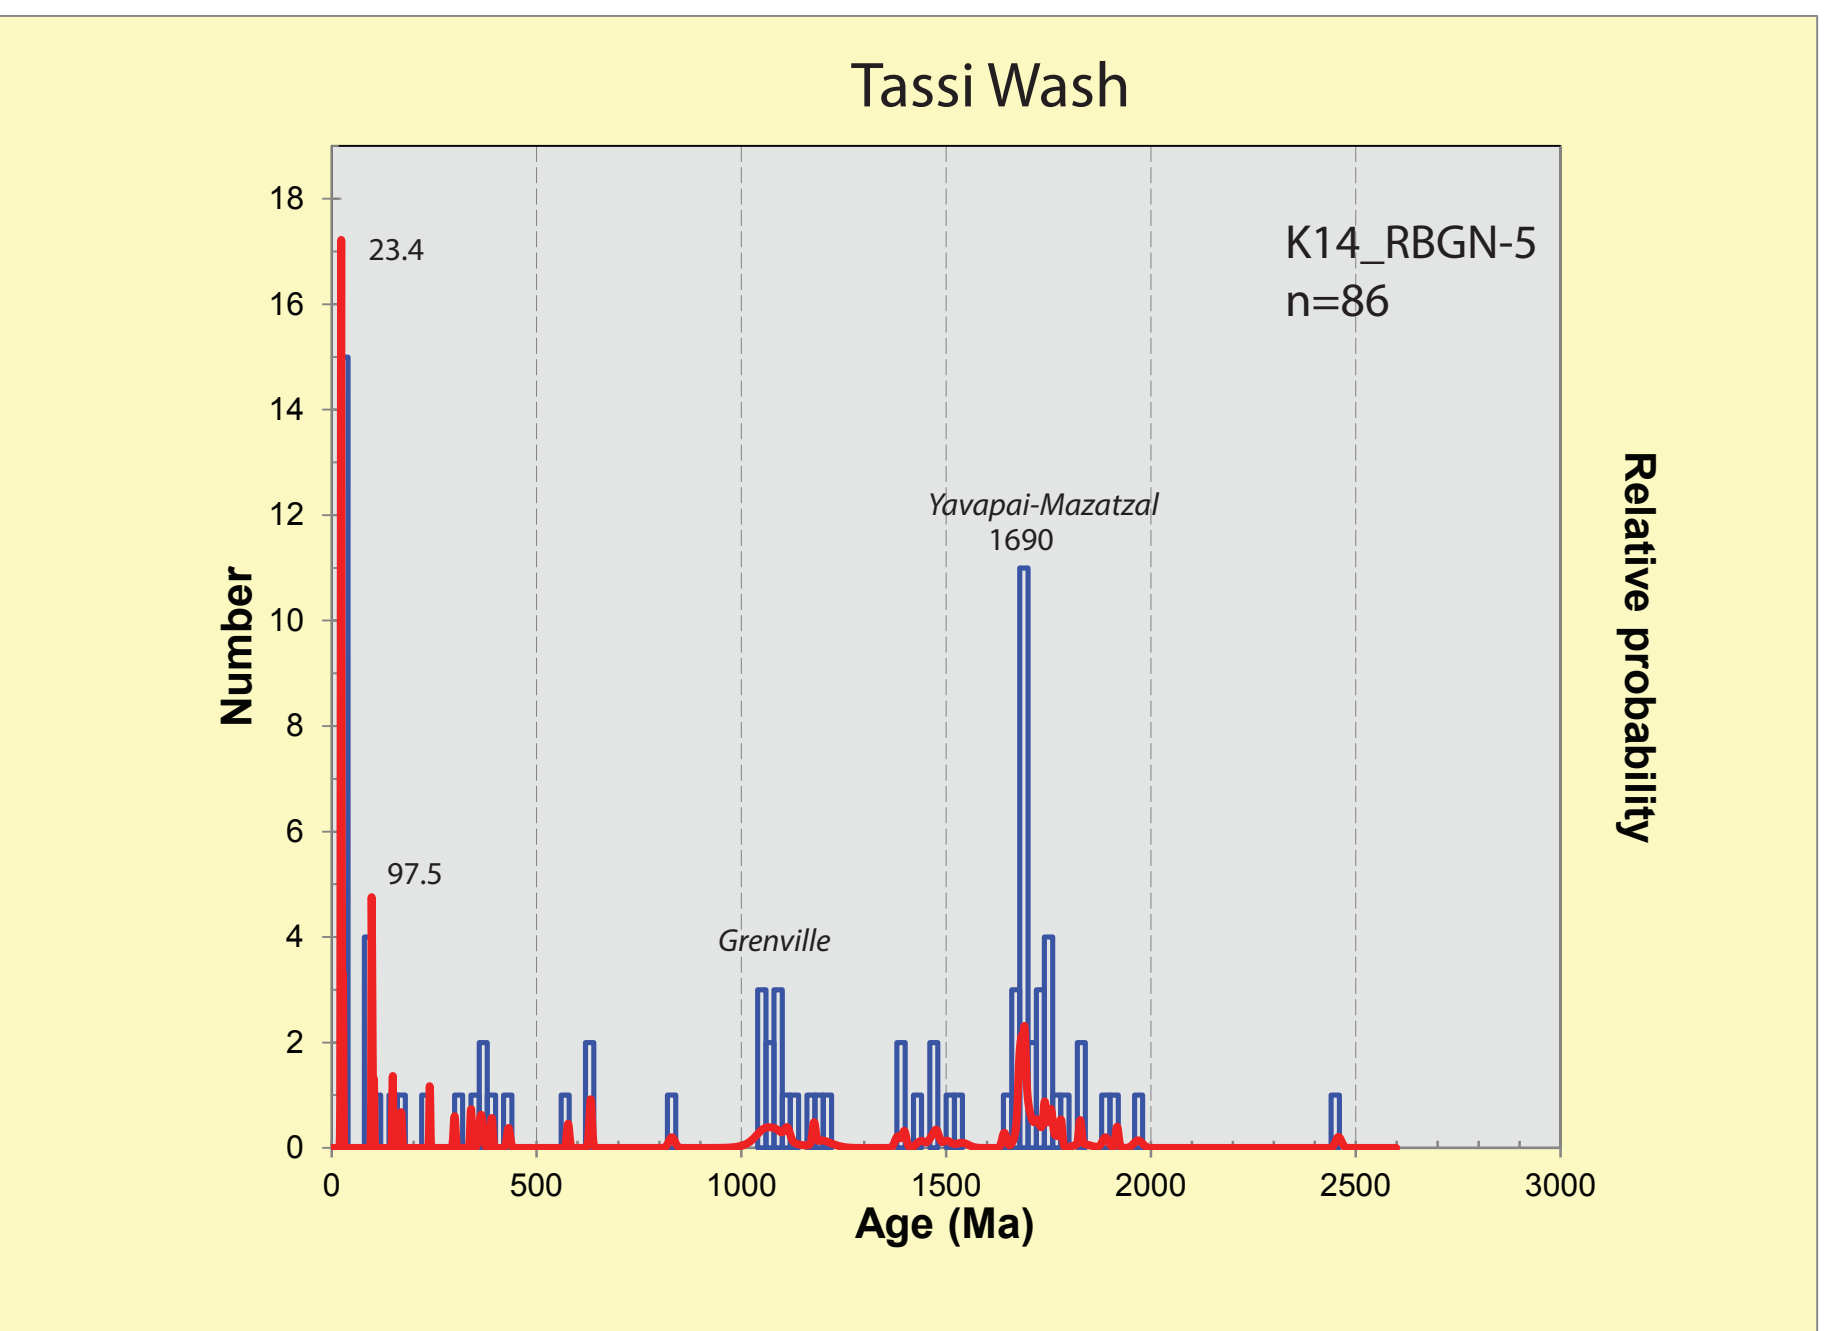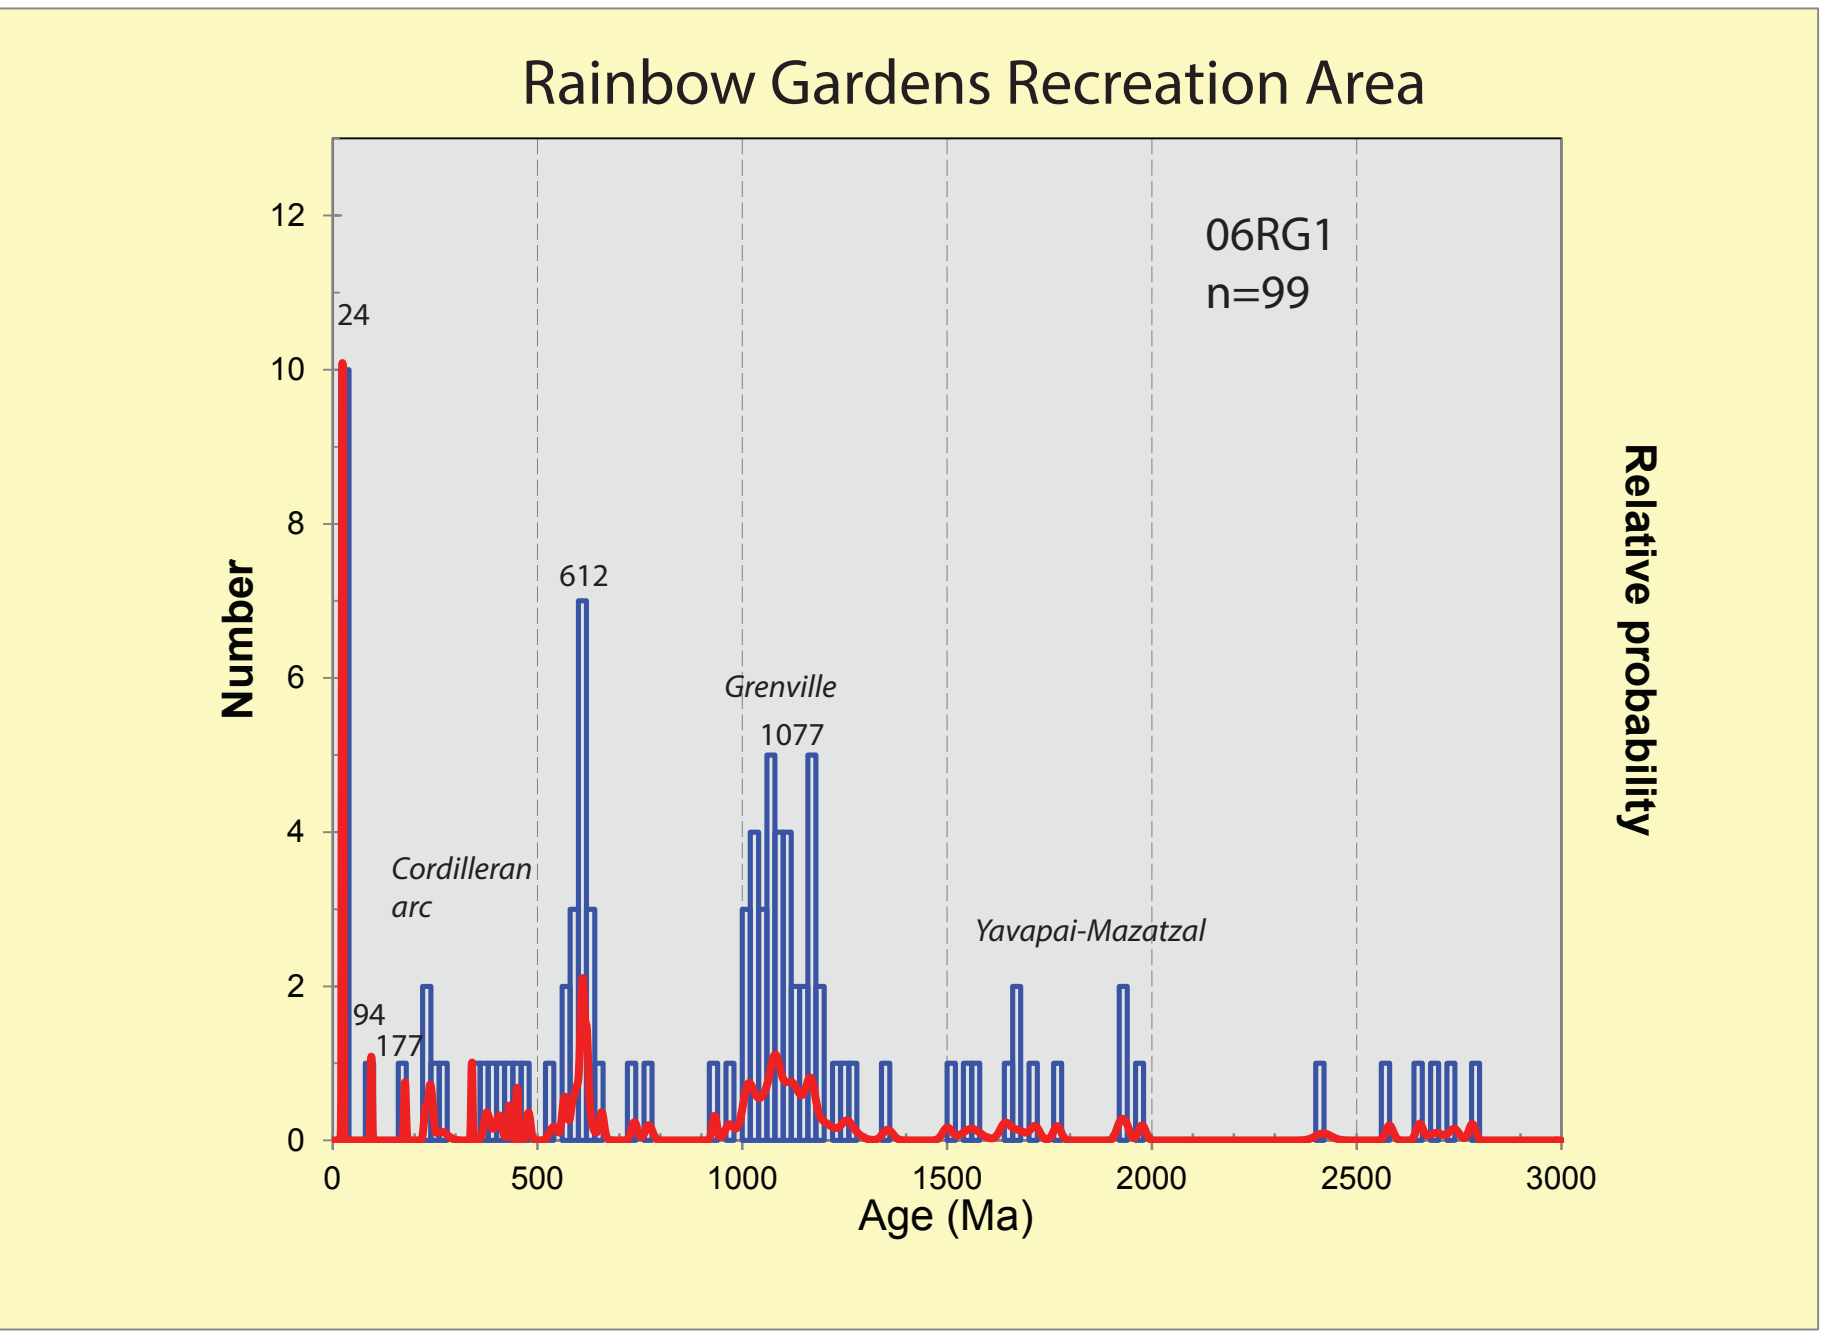

# Rainbow Gardens Recreation Area

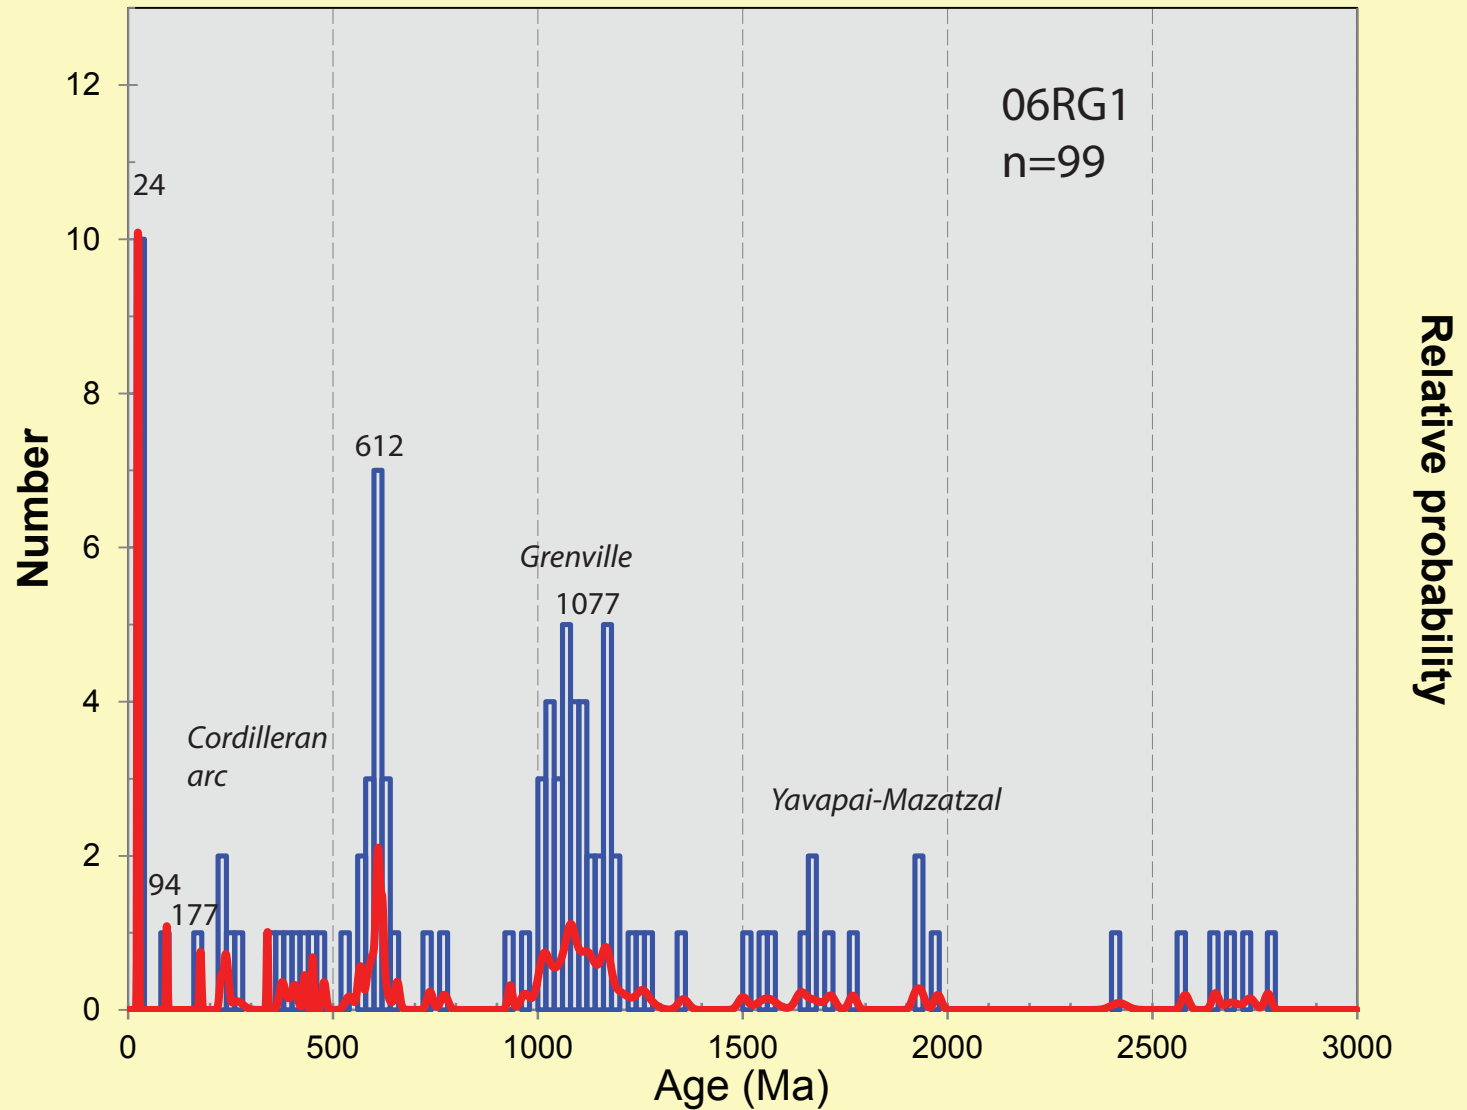

# Rainbow Gardens Recreation Area



Supplement: Supplementary file 2 [file 22411281]
