# Supplementary material
Source: publisher figshare collection journal article supplement (https://gsapubs.figshare.com/ndownloader/files/22411281)

# Upper Lime Wash

- Strong volcanic signal: tuffaceous material with glass shards
- Strong Proterozoic signal: granite and gneiss grains
- Weak Proterozoic signal: minor granite or gneiss grains within mostly quartz and sedimentary grains
- Paleozoic signal: mostly quartz and sedimentary lithic grains with no granite or gneiss
- M

Maroon tuff
- ☆

middle conglomerate unit

Note: UTM coordinates use NAD 27 CONUS for a base

## Upper Lime Wash SOUTH G

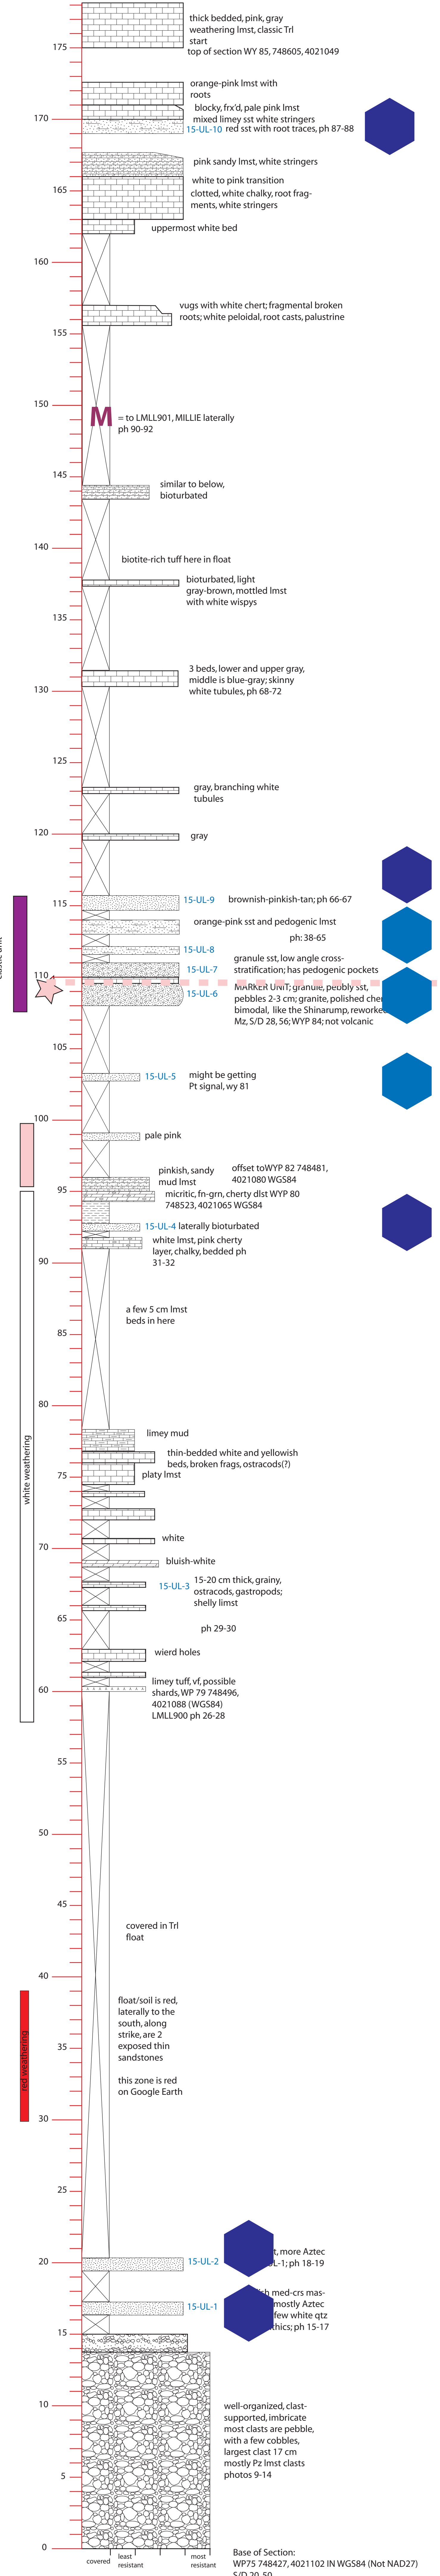

## Upper Lime Wash NORTH H

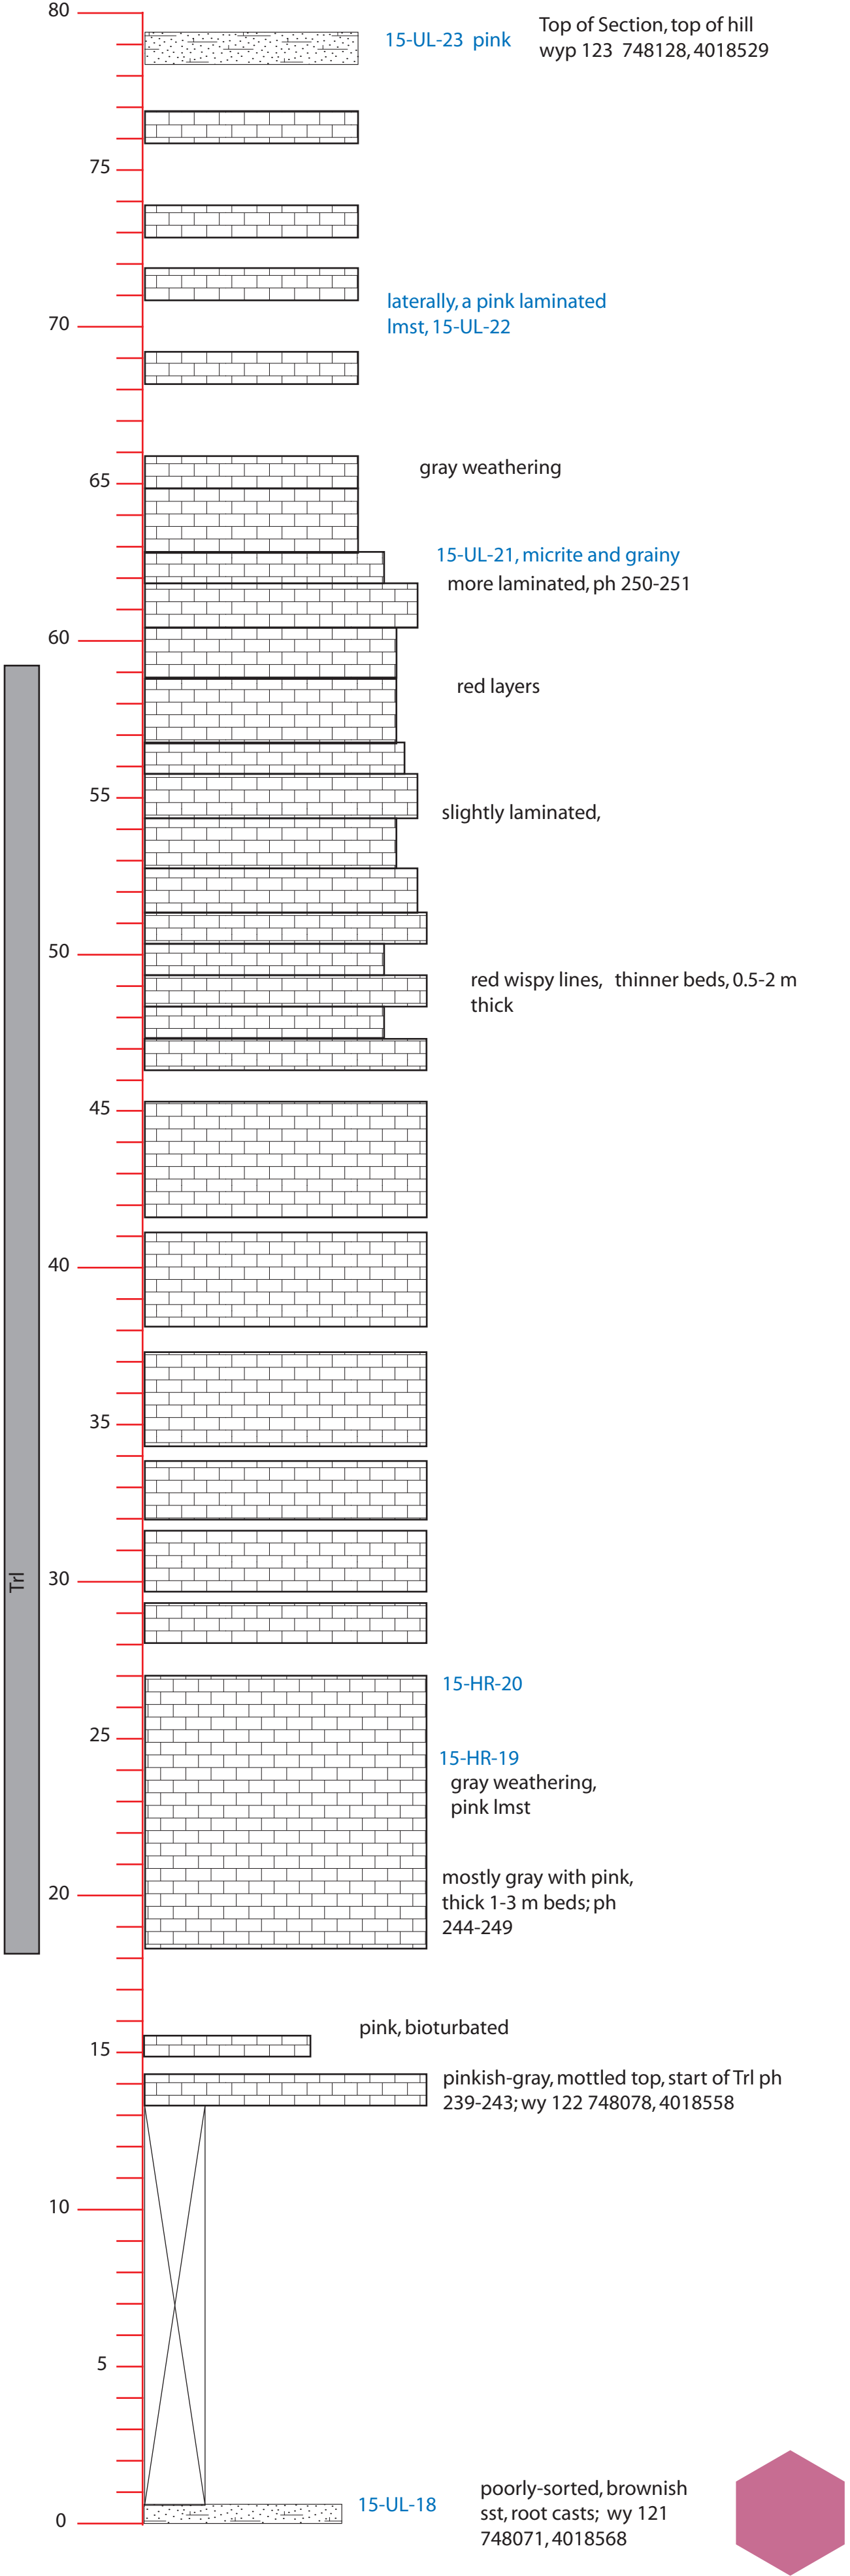

## Possible fault and lost section

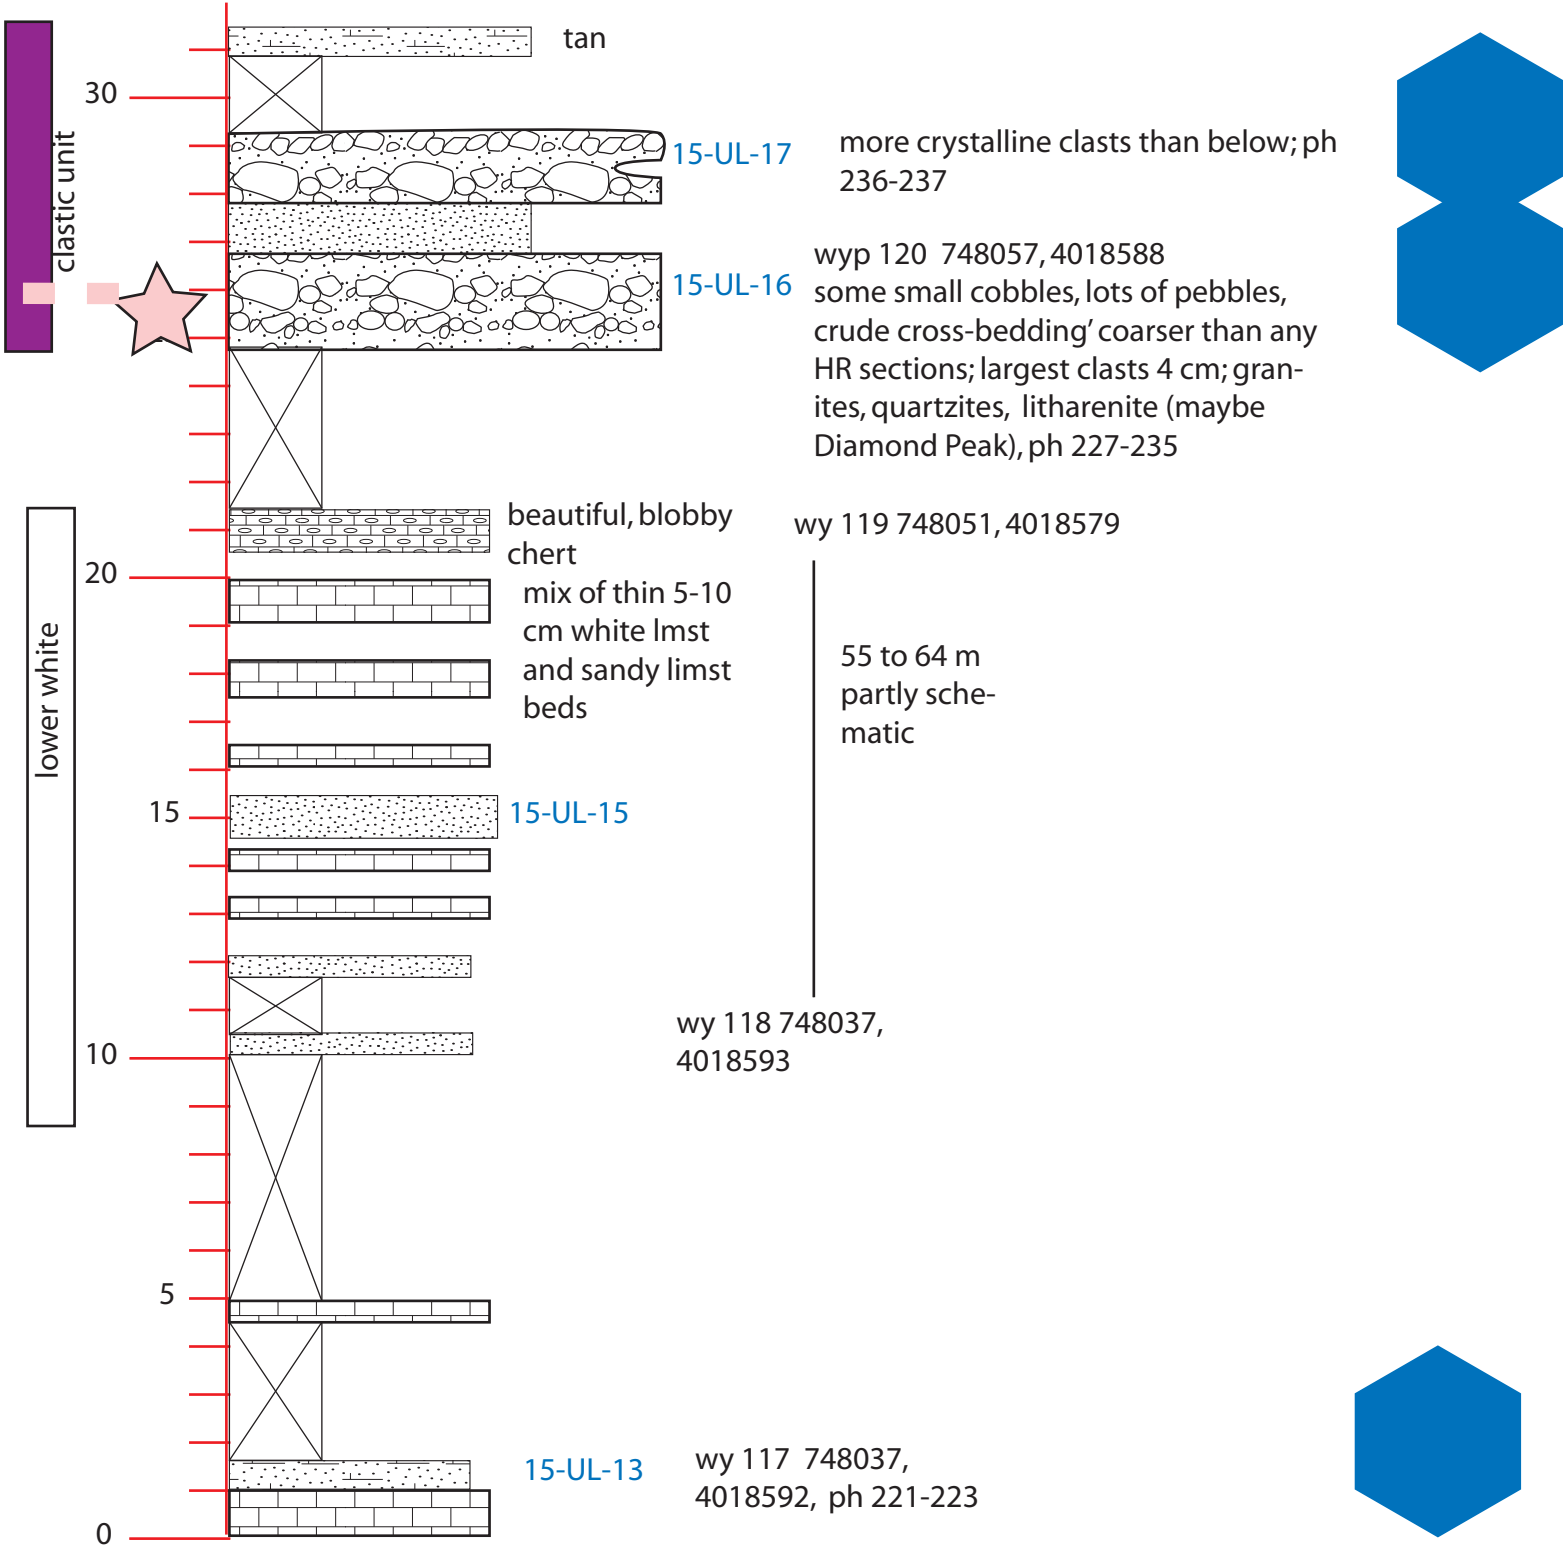

## Fault, lost section

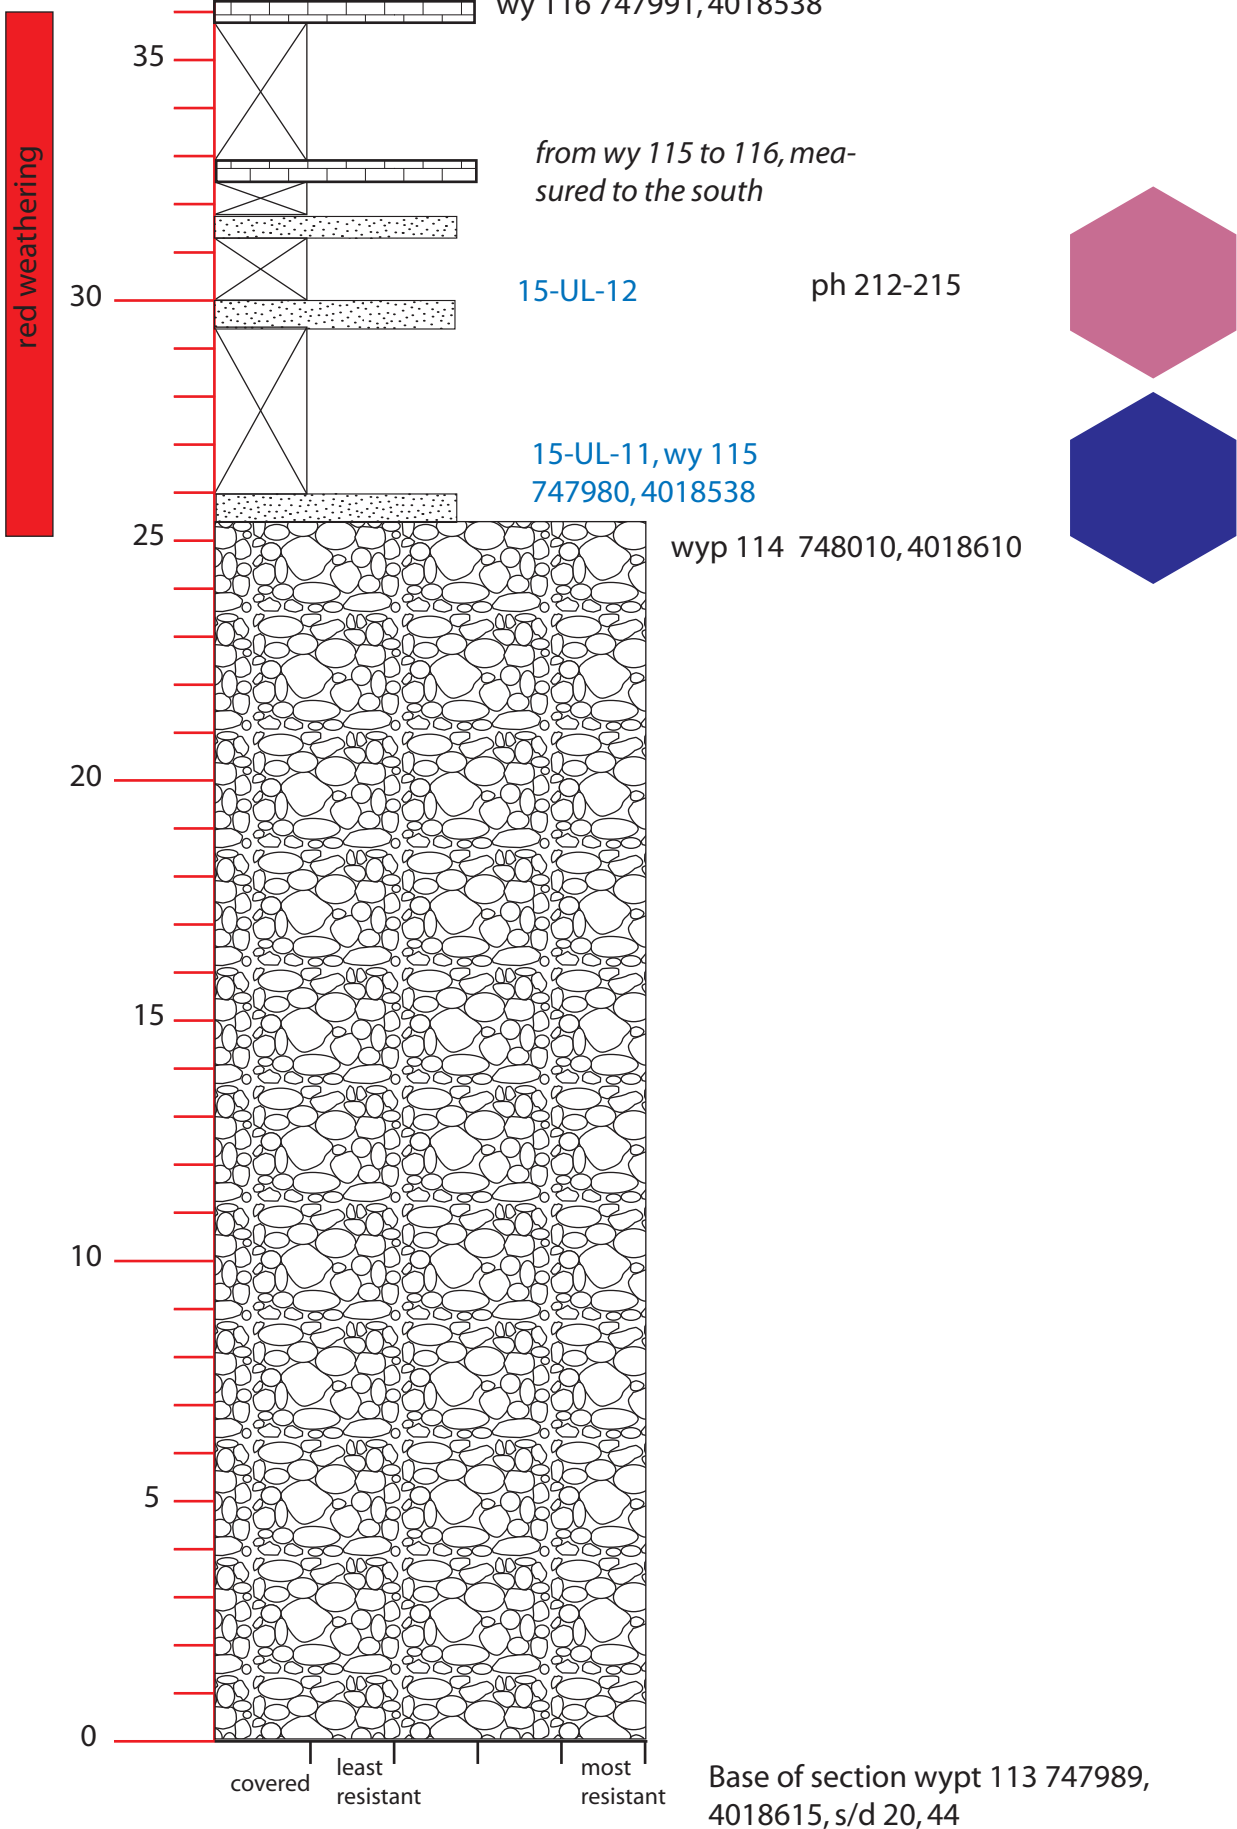

Supplement: Supplementary file 4 [file 22411281]
