# Supplementary material
Source: publisher figshare collection journal article supplement (https://gsapubs.figshare.com/ndownloader/files/22411281)
Supplement: Supplementary file 5 [file 22411281]

[illegible]

| AGE PICKS |  |  |  |  | MAXIMUM DEPOSITIONAL AGES |  |  |  |  |  |  |  |  |  |  |  |  |  |  |  |  |  |  |  |  |  |  |  |  |  |  |  |  |  |  |  |  |  |  |  |  |  |  |  |  |  |  |  |  |  |  |  |  |  |  |  |  |  |  |  |  |  |  |  |  |  |  |  |  |  |  |  |  |  |  |  |  |  |  |  |  |  |  |  |  |  |  |  |  |  |  |  |  |  |  |  |  |  |  |  |  |  |  |  |  |  |  |  |  |  |  |  |  |  |  |  |  |  |  |  |  |  |  |  |  |  |  |  |  |  |  |  |  |  |  |  |  |  |  |  |  |  |  |  |  |  |  |  |  |  |  |  |  |  |  |  |  |  |  |  |  |  |  |  |  |  |  |  |  |  |  |  |  |  |  |  |  |  |  |  |  |  |  |  |  |  |  |  |  |  |  |  |  |  |  |  |  |  |  |  |  |  |  |  |  |  |  |  |  |  |  |  |  |  |  |  |  |  |  |  |  |  |  |  |  |  |  |  |  |  |  |  |  |  |  |  |  |  |  |  |  |  |  |  |  |  |  |  |  |  |  |  |  |  |  |  |  |  |  |  |  |  |  |  |  |  |  |  |  |  |  |  |  |  |  |  |  |  |  |  |  |  |  |  |  |  |  |  |  |  |  |  |  |  |  |  |  |  |  |  |  |  |  |  |  |  |  |  |  |  |  |  |  |  |  |  |  |  |  |  |  |  |  |  |  |  |  |  |  |  |  |  |  |  |  |  |  |  |  |  |  |  |  |  |  |  |  |  |  |  |  |  |  |  |  |  |  |  |  |  |  |  |  |  |  |  |  |  |  |  |  |  |  |  |  |  |  |  |  |  |  |  |  |  |  |  |  |  |  |  |  |  |  |  |  |  |  |  |  |  |  |  |  |  |  |  |  |  |  |  |  |  |  |  |  |  |  |  |  |  |  |  |  |  |  |  |  |  |  |  |  |  |  |  |  |  |  |  |  |  |  |  |  |  |  |  |  |  |  |  |  |  |  |  |  |  |  |  |  |  |  |  |  |  |  |  |  |  |  |  |  |  |  |  |  |  |  |  |  |  |  |  |  |  |  |  |  |  |  |  |  |  |  |  |  |  |  |  |  |  |  |  |  |  |  |  |  |  |  |  |  |  |  |  |  |  |  |  |  |  |  |  |  |  |  |  |  |  |  |  |  |  |  |  |  |  |  |  |  |  |  |  |  |  |  |  |  |  |  |  |  |  |  |  |  |  |  |  |  |  |  |  |  |  |  |  |  |  |  |  |  |  |  |  |  |  |  |  |  |  |  |  |  |  |  |  |  |  |  |  |  |  |  |  |  |  |  |  |  |  |  |  |  |  |  |  |  |  |  |  |  |  |  |  |  |  |  |  |  |  |  |  |  |  |  |  |  |  |  |  |  |  |  |  |  |  |  |  |  |  |  |  |  |  |  |  |  |  |  |  |  |  |  |  |  |  |  |  |  |  |  |  |  |  |  |  |  |  |  |  |  |  |  |  |  |  |  |  |  |  |  |  |  |  |  |  |  |  |  |  |  |  |  |  |  |  |  |  |  |  |  |  |  |  |  |  |  |  |  |  |  |  |  |  |  |  |  |  |  |  |  |  |  |  |  |  |  |  |  |  |  |  |  |  |  |  |  |  |  |  |  |  |  |  |  |  |  |  |  |  |  |  |  |  |  |  |  |  |  |  |  |  |  |  |  |  |  |  |  |  |  |  |  |  |  |  |  |  |  |  |  |  |  |  |  |  |  |  |  |  |  |  |  |  |  |  |  |  |  |  |  |  |  |  |  |  |  |  |  |  |  |  |  |  |  |  |  |  |  |  |  |  |  |  |  |  |  |  |  |  |  |  |  |  |  |  |  |  |  |  |  |  |  |  |  |  |  |  |  |  |  |  |  |  |  |  |  |  |  |  |  |  |  |  |  |  |  |  |  |  |  |  |  |  |  |  |  |  |  |  |  |  |  |  |  |  |  |  |  |  |  |  |  |  |  |  |  |  |  |  |  |  |  |  |  |  |  |  |  |  |  |  |  |  |  |  |  |  |  |  |  |  |  |  |  |  |  |  |  |  |  |  |  |  |  |  |  |  |  |  |  |  |  |  |  |  |  |  |  |  |  |  |  |  |  |  |  |  |  |  |  |  |  |  |  |  |  |  |  |  |  |  |  |  |  |  |  |  |  |  |  |  |  |  |  |  |  |  |  |  |  |  |  |  |  |  |  |  |  |  |  |  |  |  |  |  |  |  |  |  |  |  |  |  |  |  |  |  |  |  |  |  |  |  |  |  |  |  |  |  |  |  |  |  |  |  |  |  |  |  |  |  |  |  |  |  |  |  |  |  |  |  |  |  |  |  |  |  |  |  |  |  |  |  |  |  |  |  |  |  |  |  |  |  |  |  |  |  |  |  |  |  |  |  |  |  |  |  |  |  |  |  |  |  |  |  |  |  |  |  |  |  |  |  |  |  |  |  |  |  |  |  |  |  |  |  |  |  |  |  |  |  |  |  |  |  |  |  |  |  |  |  |  |  |  |  |  |  |  |  |  |  |  |  |  |  |  |  |  |  |  |  |  |  |  |  |  |  |  |  |  |  |  |  |  |  |  |  |  |  |  |  |  |  |  |  |  |  |  |  |  |  |  |  |  |  |  |  |  |  |  |  |  |  |  |  |  |  |  |  |  |  |  |  |  |  |  |  |  |  |  |  |  |  |  |  |  |  |  |  |  |  |  |  |  |  |  |  |  |  |  |  |  |  |  |  |  |  |  |  |  |  |  |  |  |  |  |  |  |  |  |  |  |  |  |  |  |  |  |  |  |  |  |  |  |  |  |  |  |  |  |  |  |  |  |  |  |  |  |  |  |  |  |  |  |  |  |  |  |  |  |  |  |  |  |  |  |  |  |  |  |  |  |  |  |  |  |  |  |  |  |  |  |  |  |  |  |  |  |  |  |  |  |  |  |  |  |  |  |  |  |  |  |  |  |  |  |  |  |  |  |  |  |  |  |  |  |  |  |  |  |  |  |  |  |  |  |  |  |  |  |  |  |  |  |  |  |  |  |  |  |  |
|-----------|--|--|--|--|---------------------------|--|--|--|--|--|--|--|--|--|--|--|--|--|--|--|--|--|--|--|--|--|--|--|--|--|--|--|--|--|--|--|--|--|--|--|--|--|--|--|--|--|--|--|--|--|--|--|--|--|--|--|--|--|--|--|--|--|--|--|--|--|--|--|--|--|--|--|--|--|--|--|--|--|--|--|--|--|--|--|--|--|--|--|--|--|--|--|--|--|--|--|--|--|--|--|--|--|--|--|--|--|--|--|--|--|--|--|--|--|--|--|--|--|--|--|--|--|--|--|--|--|--|--|--|--|--|--|--|--|--|--|--|--|--|--|--|--|--|--|--|--|--|--|--|--|--|--|--|--|--|--|--|--|--|--|--|--|--|--|--|--|--|--|--|--|--|--|--|--|--|--|--|--|--|--|--|--|--|--|--|--|--|--|--|--|--|--|--|--|--|--|--|--|--|--|--|--|--|--|--|--|--|--|--|--|--|--|--|--|--|--|--|--|--|--|--|--|--|--|--|--|--|--|--|--|--|--|--|--|--|--|--|--|--|--|--|--|--|--|--|--|--|--|--|--|--|--|--|--|--|--|--|--|--|--|--|--|--|--|--|--|--|--|--|--|--|--|--|--|--|--|--|--|--|--|--|--|--|--|--|--|--|--|--|--|--|--|--|--|--|--|--|--|--|--|--|--|--|--|--|--|--|--|--|--|--|--|--|--|--|--|--|--|--|--|--|--|--|--|--|--|--|--|--|--|--|--|--|--|--|--|--|--|--|--|--|--|--|--|--|--|--|--|--|--|--|--|--|--|--|--|--|--|--|--|--|--|--|--|--|--|--|--|--|--|--|--|--|--|--|--|--|--|--|--|--|--|--|--|--|--|--|--|--|--|--|--|--|--|--|--|--|--|--|--|--|--|--|--|--|--|--|--|--|--|--|--|--|--|--|--|--|--|--|--|--|--|--|--|--|--|--|--|--|--|--|--|--|--|--|--|--|--|--|--|--|--|--|--|--|--|--|--|--|--|--|--|--|--|--|--|--|--|--|--|--|--|--|--|--|--|--|--|--|--|--|--|--|--|--|--|--|--|--|--|--|--|--|--|--|--|--|--|--|--|--|--|--|--|--|--|--|--|--|--|--|--|--|--|--|--|--|--|--|--|--|--|--|--|--|--|--|--|--|--|--|--|--|--|--|--|--|--|--|--|--|--|--|--|--|--|--|--|--|--|--|--|--|--|--|--|--|--|--|--|--|--|--|--|--|--|--|--|--|--|--|--|--|--|--|--|--|--|--|--|--|--|--|--|--|--|--|--|--|--|--|--|--|--|--|--|--|--|--|--|--|--|--|--|--|--|--|--|--|--|--|--|--|--|--|--|--|--|--|--|--|--|--|--|--|--|--|--|--|--|--|--|--|--|--|--|--|--|--|--|--|--|--|--|--|--|--|--|--|--|--|--|--|--|--|--|--|--|--|--|--|--|--|--|--|--|--|--|--|--|--|--|--|--|--|--|--|--|--|--|--|--|--|--|--|--|--|--|--|--|--|--|--|--|--|--|--|--|--|--|--|--|--|--|--|--|--|--|--|--|--|--|--|--|--|--|--|--|--|--|--|--|--|--|--|--|--|--|--|--|--|--|--|--|--|--|--|--|--|--|--|--|--|--|--|--|--|--|--|--|--|--|--|--|--|--|--|--|--|--|--|--|--|--|--|--|--|--|--|--|--|--|--|--|--|--|--|--|--|--|--|--|--|--|--|--|--|--|--|--|--|--|--|--|--|--|--|--|--|--|--|--|--|--|--|--|--|--|--|--|--|--|--|--|--|--|--|--|--|--|--|--|--|--|--|--|--|--|--|--|--|--|--|--|--|--|--|--|--|--|--|--|--|--|--|--|--|--|--|--|--|--|--|--|--|--|--|--|--|--|--|--|--|--|--|--|--|--|--|--|--|--|--|--|--|--|--|--|--|--|--|--|--|--|--|--|--|--|--|--|--|--|--|--|--|--|--|--|--|--|--|--|--|--|--|--|--|--|--|--|--|--|--|--|--|--|--|--|--|--|--|--|--|--|--|--|--|--|--|--|--|--|--|--|--|--|--|--|--|--|--|--|--|--|--|--|--|--|--|--|--|--|--|--|--|--|--|--|--|--|--|--|--|--|--|--|--|--|--|--|--|--|--|--|--|--|--|--|--|--|--|--|--|--|--|--|--|--|--|--|--|--|--|--|--|--|--|--|--|--|--|--|--|--|--|--|--|--|--|--|--|--|--|--|--|--|--|--|--|--|--|--|--|--|--|--|--|--|--|--|--|--|--|--|--|--|--|--|--|--|--|--|--|--|--|--|--|--|--|--|--|--|--|--|--|--|--|--|--|--|--|--|--|--|--|--|--|--|--|--|--|--|--|--|--|--|--|--|--|--|--|--|--|--|--|--|--|--|--|--|--|--|--|--|--|--|--|--|--|--|--|--|--|--|--|--|--|--|--|--|--|--|--|--|--|--|--|--|--|--|--|--|--|--|--|--|--|--|--|--|--|--|--|--|--|--|--|--|--|--|--|--|--|--|--|--|--|--|--|--|--|--|--|--|--|--|--|--|--|--|--|--|--|--|--|--|--|--|--|--|--|--|--|--|--|--|--|--|--|--|--|--|--|--|--|--|--|--|--|--|--|--|--|--|--|--|--|--|--|--|--|--|--|--|--|--|--|--|--|--|--|--|--|--|--|--|--|--|--|--|--|--|--|--|--|--|--|--|--|--|--|--|--|--|--|--|--|--|--|--|--|--|--|--|--|--|--|--|--|--|--|--|--|--|--|--|--|--|--|--|--|--|--|--|--|--|--|--|--|--|--|--|--|--|--|--|--|--|--|--|--|--|--|--|--|--|--|--|--|--|--|--|--|--|--|--|--|--|--|--|--|--|--|--|--|--|--|--|--|--|--|--|--|--|--|--|--|--|--|--|--|--|--|--|--|--|--|--|--|--|--|--|--|--|--|--|--|--|--|--|--|--|--|--|--|--|--|--|--|--|--|--|--|--|--|--|--|--|--|--|--|--|--|--|--|--|--|--|--|--|--|--|--|--|--|--|--|--|--|--|--|--|
|-----------|--|--|--|--|---------------------------|--|--|--|--|--|--|--|--|--|--|--|--|--|--|--|--|--|--|--|--|--|--|--|--|--|--|--|--|--|--|--|--|--|--|--|--|--|--|--|--|--|--|--|--|--|--|--|--|--|--|--|--|--|--|--|--|--|--|--|--|--|--|--|--|--|--|--|--|--|--|--|--|--|--|--|--|--|--|--|--|--|--|--|--|--|--|--|--|--|--|--|--|--|--|--|--|--|--|--|--|--|--|--|--|--|--|--|--|--|--|--|--|--|--|--|--|--|--|--|--|--|--|--|--|--|--|--|--|--|--|--|--|--|--|--|--|--|--|--|--|--|--|--|--|--|--|--|--|--|--|--|--|--|--|--|--|--|--|--|--|--|--|--|--|--|--|--|--|--|--|--|--|--|--|--|--|--|--|--|--|--|--|--|--|--|--|--|--|--|--|--|--|--|--|--|--|--|--|--|--|--|--|--|--|--|--|--|--|--|--|--|--|--|--|--|--|--|--|--|--|--|--|--|--|--|--|--|--|--|--|--|--|--|--|--|--|--|--|--|--|--|--|--|--|--|--|--|--|--|--|--|--|--|--|--|--|--|--|--|--|--|--|--|--|--|--|--|--|--|--|--|--|--|--|--|--|--|--|--|--|--|--|--|--|--|--|--|--|--|--|--|--|--|--|--|--|--|--|--|--|--|--|--|--|--|--|--|--|--|--|--|--|--|--|--|--|--|--|--|--|--|--|--|--|--|--|--|--|--|--|--|--|--|--|--|--|--|--|--|--|--|--|--|--|--|--|--|--|--|--|--|--|--|--|--|--|--|--|--|--|--|--|--|--|--|--|--|--|--|--|--|--|--|--|--|--|--|--|--|--|--|--|--|--|--|--|--|--|--|--|--|--|--|--|--|--|--|--|--|--|--|--|--|--|--|--|--|--|--|--|--|--|--|--|--|--|--|--|--|--|--|--|--|--|--|--|--|--|--|--|--|--|--|--|--|--|--|--|--|--|--|--|--|--|--|--|--|--|--|--|--|--|--|--|--|--|--|--|--|--|--|--|--|--|--|--|--|--|--|--|--|--|--|--|--|--|--|--|--|--|--|--|--|--|--|--|--|--|--|--|--|--|--|--|--|--|--|--|--|--|--|--|--|--|--|--|--|--|--|--|--|--|--|--|--|--|--|--|--|--|--|--|--|--|--|--|--|--|--|--|--|--|--|--|--|--|--|--|--|--|--|--|--|--|--|--|--|--|--|--|--|--|--|--|--|--|--|--|--|--|--|--|--|--|--|--|--|--|--|--|--|--|--|--|--|--|--|--|--|--|--|--|--|--|--|--|--|--|--|--|--|--|--|--|--|--|--|--|--|--|--|--|--|--|--|--|--|--|--|--|--|--|--|--|--|--|--|--|--|--|--|--|--|--|--|--|--|--|--|--|--|--|--|--|--|--|--|--|--|--|--|--|--|--|--|--|--|--|--|--|--|--|--|--|--|--|--|--|--|--|--|--|--|--|--|--|--|--|--|--|--|--|--|--|--|--|--|--|--|--|--|--|--|--|--|--|--|--|--|--|--|--|--|--|--|--|--|--|--|--|--|--|--|--|--|--|--|--|--|--|--|--|--|--|--|--|--|--|--|--|--|--|--|--|--|--|--|--|--|--|--|--|--|--|--|--|--|--|--|--|--|--|--|--|--|--|--|--|--|--|--|--|--|--|--|--|--|--|--|--|--|--|--|--|--|--|--|--|--|--|--|--|--|--|--|--|--|--|--|--|--|--|--|--|--|--|--|--|--|--|--|--|--|--|--|--|--|--|--|--|--|--|--|--|--|--|--|--|--|--|--|--|--|--|--|--|--|--|--|--|--|--|--|--|--|--|--|--|--|--|--|--|--|--|--|--|--|--|--|--|--|--|--|--|--|--|--|--|--|--|--|--|--|--|--|--|--|--|--|--|--|--|--|--|--|--|--|--|--|--|--|--|--|--|--|--|--|--|--|--|--|--|--|--|--|--|--|--|--|--|--|--|--|--|--|--|--|--|--|--|--|--|--|--|--|--|--|--|--|--|--|--|--|--|--|--|--|--|--|--|--|--|--|--|--|--|--|--|--|--|--|--|--|--|--|--|--|--|--|--|--|--|--|--|--|--|--|--|--|--|--|--|--|--|--|--|--|--|--|--|--|--|--|--|--|--|--|--|--|--|--|--|--|--|--|--|--|--|--|--|--|--|--|--|--|--|--|--|--|--|--|--|--|--|--|--|--|--|--|--|--|--|--|--|--|--|--|--|--|--|--|--|--|--|--|--|--|--|--|--|--|--|--|--|--|--|--|--|--|--|--|--|--|--|--|--|--|--|--|--|--|--|--|--|--|--|--|--|--|--|--|--|--|--|--|--|--|--|--|--|--|--|--|--|--|--|--|--|--|--|--|--|--|--|--|--|--|--|--|--|--|--|--|--|--|--|--|--|--|--|--|--|--|--|--|--|--|--|--|--|--|--|--|--|--|--|--|--|--|--|--|--|--|--|--|--|--|--|--|--|--|--|--|--|--|--|--|--|--|--|--|--|--|--|--|--|--|--|--|--|--|--|--|--|--|--|--|--|--|--|--|--|--|--|--|--|--|--|--|--|--|--|--|--|--|--|--|--|--|--|--|--|--|--|--|--|--|--|--|--|--|--|--|--|--|--|--|--|--|--|--|--|--|--|--|--|--|--|--|--|--|--|--|--|--|--|--|--|--|--|--|--|--|--|--|--|--|--|--|--|--|--|--|--|--|--|--|--|--|--|--|--|--|--|--|--|--|--|--|--|--|--|--|--|--|--|--|--|--|--|--|--|--|--|--|--|--|--|--|--|--|--|--|--|--|--|--|--|--|--|--|--|--|--|--|--|--|--|--|--|--|--|--|--|--|--|--|--|--|--|--|--|--|--|--|--|--|--|--|--|--|--|--|--|--|--|--|--|--|--|--|--|--|--|--|--|--|--|--|--|--|--|--|--|--|--|--|--|--|--|--|--|--|--|--|--|--|--|--|--|--|--|--|--|--|--|--|--|--|--|--|--|--|--|--|--|--|--|--|--|--|--|--|--|--|--|--|

| AGE PICKS                    |         |          |          |          | MAXIMUM DEPOSITIONAL AGES |                  |        |  |  |                             |        |                                      |  |                                 |                               |  |                                      |                |                               |
|------------------------------|---------|----------|----------|----------|---------------------------|------------------|--------|--|--|-----------------------------|--------|--------------------------------------|--|---------------------------------|-------------------------------|--|--------------------------------------|----------------|-------------------------------|
|                              |         |          |          |          |                           | All MIOCENE AGES |        |  |  | YSG (Youngest single grain) |        | YPP (Youngest from Probability plot) |  | YC 1- sigma (2 or more grains)* |                               |  | YC 2-sigma (3 three or more grains)* |                |                               |
|                              |         |          |          |          |                           |                  |        |  |  |                             |        |                                      |  |                                 |                               |  |                                      |                |                               |
| K14-RBGN 8 Tassi Wash, upper |         |          |          |          | n=-                       | Best age (Ma)    | ± (Ma) |  |  | Best age (Ma)               | ± (Ma) | 22.4 Ma                              |  | Age                             | ± 1 sigma                     |  |                                      | NA             |                               |
| MIN AGE                      | MAX AGE | # GRAINS | PEAK AGE | # GRAINS |                           | 22.4             | 0.7    |  |  | 22.4                        | 0.7    | n=4                                  |  | 22.4                            | 0.7                           |  |                                      |                |                               |
| 21                           | 25      | 4        | 23       | 4        |                           | 22.5             | 0.9    |  |  |                             |        |                                      |  | 22.5                            | 0.9                           |  |                                      |                |                               |
| 407                          | 435     | 3        | 422      | 3        |                           | 23.0             | 0.9    |  |  |                             |        |                                      |  |                                 |                               |  |                                      |                |                               |
| 868                          | 1449    | 62       | 1092     | 52       |                           | 25.1             | 1.2    |  |  |                             |        |                                      |  | 22.45761                        | Wtd Mean (from internal errs) |  |                                      |                |                               |
| 1651                         | 1848    | 13       | 1313     | 9        |                           |                  |        |  |  |                             |        |                                      |  | 1.082536                        | 2-sigma err. of mean          |  |                                      |                |                               |
|                              |         |          | 1409     | 5        |                           |                  |        |  |  |                             |        |                                      |  | 0.00679                         | MSWD                          |  |                                      |                |                               |
|                              |         |          | 1435     | 4        |                           |                  |        |  |  |                             |        |                                      |  | 0                               | rejected                      |  |                                      |                |                               |
|                              |         |          | 1674     | 5        |                           |                  |        |  |  |                             |        |                                      |  | 0.934328                        | Probability of fit            |  |                                      |                |                               |
|                              |         |          | 1714     | 4        |                           |                  |        |  |  |                             |        |                                      |  |                                 |                               |  |                                      |                |                               |
|                              |         |          | 1780     | 5        |                           |                  |        |  |  |                             |        |                                      |  |                                 | User specifies                |  |                                      |                |                               |
|                              |         |          | 1822     | 4        |                           |                  |        |  |  |                             |        |                                      |  |                                 | FALSE % out                   |  |                                      |                |                               |
|                              |         |          |          |          |                           |                  |        |  |  |                             |        |                                      |  |                                 | FALSE % in                    |  |                                      |                |                               |
|                              |         |          |          |          |                           |                  |        |  |  |                             |        |                                      |  |                                 | 1 Sigma level                 |  |                                      |                |                               |
|                              |         |          |          |          |                           |                  |        |  |  |                             |        |                                      |  |                                 | TRUE Can reject               |  |                                      |                |                               |
|                              |         |          |          |          |                           |                  |        |  |  |                             |        |                                      |  |                                 | FALSE Const. ext. err         |  |                                      |                |                               |
| 6RG1 RGRA                    |         |          |          |          | n=                        | Best age (Ma)    | ± (Ma) |  |  | Best age (Ma)               | ± (Ma) | 24 Ma                                |  | Age                             | ± 1 sigma                     |  |                                      | Best age (Ma)  | ± 2 sigma                     |
| MIN AGE                      | MAX AGE | # GRAINS | PEAK AGE | # GRAINS |                           | 22.5             | 1.4    |  |  | 22.5                        | 1.4    | n=10                                 |  | 22.5                            | 1.4                           |  |                                      | 22.5           | 1.4                           |
| 20                           | 29      | 10       | 24       | 10       |                           | 22.9             | 1.5    |  |  |                             |        |                                      |  | 22.9                            | 1.5                           |  |                                      | 22.9           | 1.5                           |
| 223                          | 251     | 3        | 237      | 4        |                           | 23.3             | 2.5    |  |  |                             |        |                                      |  | 23.3                            | 2.5                           |  |                                      | 23.3           | 2.5                           |
| 381                          | 402     | 1        | 402      | 3        |                           | 23.8             | 1.4    |  |  |                             |        |                                      |  |                                 |                               |  |                                      | 23.8           | 1.4                           |
| 415                          | 433     | 1        | 429      | 3        |                           | 24.1             | 1.0    |  |  |                             |        |                                      |  | 22.76327                        | Wtd Mean (from internal errs) |  |                                      | 24.1           | 1.0                           |
| 553                          | 653     | 15       | 613      | 12       |                           | 25.0             | 1.1    |  |  |                             |        |                                      |  | 1.887138                        | 2-sigma err. of mean          |  |                                      |                |                               |
| 911                          | 1346    | 39       | 935      | 5        |                           | 25.2             | 1.8    |  |  |                             |        |                                      |  | 0.055863                        | MSWD                          |  |                                      | 23.47346759    | Wtd Mean (from internal errs) |
| 1483                         | 1544    | 1        | 1085     | 27       |                           | 25.3             | 1.3    |  |  |                             |        |                                      |  | 0                               | rejected                      |  |                                      | 0.621352617    | 2-sigma err. of mean          |
| 1550                         | 1759    | 6        | 1151     | 22       |                           | 26.0             | 2.4    |  |  |                             |        |                                      |  | 0.945668                        | Probability of fit            |  |                                      | 1.145301605    | MSWD                          |
| 1940                         | 1958    | 0        | 1506     | 3        |                           | 26.3             | 1.5    |  |  |                             |        |                                      |  |                                 | 0 rejected                    |  |                                      |                |                               |
| 2750                         | 2766    | 0        | 1568     | 3        |                           |                  |        |  |  |                             |        |                                      |  |                                 | User specifies                |  |                                      | 0.3330268      | Probability of fit            |
|                              |         |          | 1642     | 4        |                           |                  |        |  |  |                             |        |                                      |  |                                 | FALSE % out                   |  |                                      |                |                               |
|                              |         |          | 1710     | 3        |                           |                  |        |  |  |                             |        |                                      |  |                                 | FALSE % in                    |  |                                      | User specifies |                               |
|                              |         |          |          |          |                           |                  |        |  |  |                             |        |                                      |  |                                 | 1 Sigma level                 |  |                                      | FALSE % out    |                               |
|                              |         |          |          |          |                           |                  |        |  |  |                             |        |                                      |  |                                 | TRUE Can reject               |  |                                      | FALSE % in     |                               |
|                              |         |          |          |          |                           |                  |        |  |  |                             |        |                                      |  |                                 | FALSE Const. ext. err         |  |                                      | 2 Sigma level  |                               |
|                              |         |          |          |          |                           |                  |        |  |  |                             |        |                                      |  |                                 | TRUE Can reject               |  |                                      |                |                               |
|                              |         |          |          |          |                           |                  |        |  |  |                             |        |                                      |  |                                 | FALSE Const. ext. err         |  |                                      |                |                               |

| AGE PICKS |         |          |          |          | MAXIMUM DEPOSITIONAL AGES |  |                      |  |                             |  |                                      |  |                                 |  |                                      |  |  |  |
|-----------|---------|----------|----------|----------|---------------------------|--|----------------------|--|-----------------------------|--|--------------------------------------|--|---------------------------------|--|--------------------------------------|--|--|--|
|           |         |          |          |          | All MIOCENE AGES          |  |                      |  | YSG (Youngest single grain) |  | YPP (Youngest from Probability plot) |  | YC 1- sigma (2 or more grains)* |  | YC 2-sigma (3 three or more grains)* |  |  |  |
|           |         |          |          |          |                           |  |                      |  |                             |  |                                      |  |                                 |  |                                      |  |  |  |
| n=        |         |          |          |          | Best age (Ma) ± (Ma)      |  | Best age (Ma) ± (Ma) |  | 25.5 Ma                     |  | Age ± 1 sigma                        |  | NA                              |  |                                      |  |  |  |
| MIN AGE   | MAX AGE | # GRAINS | PEAK AGE | # GRAINS | 24.5 0.3                  |  | 24.5 0.3             |  | n=2                         |  | 24.5 0.3                             |  |                                 |  |                                      |  |  |  |
| 81        | 89      | 3        | 84       | 4        | 25.2 0.4                  |  |                      |  |                             |  | 25.2 0.4                             |  |                                 |  |                                      |  |  |  |
| 97        | 102     | 4        | 87       | 4        |                           |  |                      |  |                             |  |                                      |  |                                 |  |                                      |  |  |  |
| 174       | 179     | 1        | 98       | 4        |                           |  |                      |  |                             |  |                                      |  |                                 |  |                                      |  |  |  |
| 183       | 194     | 1        | 175      | 3        |                           |  |                      |  |                             |  |                                      |  |                                 |  |                                      |  |  |  |
| 404       | 414     | 1        | 184      | 3        |                           |  |                      |  |                             |  |                                      |  |                                 |  |                                      |  |  |  |
| 425       | 436     | 0        | 407      | 3        |                           |  |                      |  |                             |  |                                      |  |                                 |  |                                      |  |  |  |
| 1001      | 1242    | 11       | 1074     | 7        |                           |  |                      |  |                             |  |                                      |  |                                 |  |                                      |  |  |  |
| 1521      | 1525    | 0        | 1169     | 6        |                           |  |                      |  |                             |  |                                      |  |                                 |  |                                      |  |  |  |
| 1562      | 1933    | 67       | 1717     | 53       |                           |  |                      |  |                             |  |                                      |  |                                 |  |                                      |  |  |  |
| 2024      | 2158    | 3        | 1890     | 5        |                           |  |                      |  |                             |  |                                      |  |                                 |  |                                      |  |  |  |
| 2238      | 2242    | 0        | 2096     | 3        |                           |  |                      |  |                             |  |                                      |  |                                 |  |                                      |  |  |  |
|           |         |          |          |          |                           |  |                      |  |                             |  |                                      |  |                                 |  |                                      |  |  |  |
|           |         |          |          |          |                           |  |                      |  |                             |  |                                      |  |                                 |  |                                      |  |  |  |
|           |         |          |          |          |                           |  |                      |  |                             |  |                                      |  |                                 |  |                                      |  |  |  |
|           |         |          |          |          |                           |  |                      |  |                             |  |                                      |  |                                 |  |                                      |  |  |  |
| n=        |         |          |          |          | Best age (Ma) ± (Ma)      |  | Best age (Ma) ± (Ma) |  | 20 Ma                       |  | Age ± 1 sigma                        |  | Age ± 1 sigma                   |  |                                      |  |  |  |
| DZ AGES   |         |          |          |          | 18.5 0.9 20.1 0.8         |  | 18.5 0.9             |  | n=52                        |  | 18.5 0.9                             |  | 18.5 0.9                        |  |                                      |  |  |  |
| MIN AGE   | MAX AGE | # GRAINS | PEAK AGE | # GRAINS | 18.6 1.2 20.2 0.6         |  |                      |  |                             |  | 18.6 1.2                             |  | 18.6 1.2                        |  |                                      |  |  |  |
| 17        | 24      | 52       | 20       | 50       | 18.7 0.7 20.2 0.5         |  |                      |  |                             |  | 18.7 0.7                             |  | 18.7 0.7                        |  |                                      |  |  |  |
| 96        | 103     | 3        | 100      | 3        | 19.0 0.3 20.2 0.4         |  |                      |  |                             |  |                                      |  | 19.0 0.3                        |  |                                      |  |  |  |
| 113       | 121     | 3        | 117      | 3        | 19.0 0.7 20.2 0.8         |  |                      |  |                             |  |                                      |  | 19.0 0.7                        |  |                                      |  |  |  |
| 147       | 157     | 2        | 150      | 3        | 19.5 0.4 20.3 0.4         |  |                      |  |                             |  |                                      |  |                                 |  |                                      |  |  |  |
| 1293      | 1554    | 28       | 1387     | 19       | 19.5 0.7 20.3 0.5         |  |                      |  |                             |  |                                      |  |                                 |  |                                      |  |  |  |
| 1581      | 1948    | 182      | 1534     | 3        | 19.5 0.9 20.3 0.6         |  |                      |  |                             |  |                                      |  |                                 |  |                                      |  |  |  |
| 2081      | 2094    | 1        | 1691     | 139      | 19.5 1.2 20.3 0.6         |  |                      |  |                             |  |                                      |  |                                 |  |                                      |  |  |  |
| 2122      | 2138    | 0        | 1872     | 9        | 19.6 0.4 20.4 0.4         |  |                      |  |                             |  |                                      |  |                                 |  |                                      |  |  |  |
| 2523      | 2532    | 0        |          |          | 19.7 0.6 20.4 0.6         |  |                      |  |                             |  |                                      |  |                                 |  |                                      |  |  |  |
|           |         |          |          |          | 19.7 0.8 20.4 0.6         |  |                      |  |                             |  |                                      |  |                                 |  |                                      |  |  |  |
|           |         |          |          |          | 19.8 0.6 20.4 0.5         |  |                      |  |                             |  |                                      |  | User specifies                  |  |                                      |  |  |  |
|           |         |          |          |          | 19.8 0.4 20.5 1.1         |  |                      |  |                             |  |                                      |  | FALSE % out                     |  |                                      |  |  |  |
|           |         |          |          |          | 19.8 1.1 20.5 1.0         |  |                      |  |                             |  |                                      |  | FALSE % in                      |  |                                      |  |  |  |
|           |         |          |          |          | 19.8 0.6 20.6 0.5         |  |                      |  |                             |  |                                      |  | 1 Sigma level                   |  |                                      |  |  |  |
|           |         |          |          |          | 19.9 0.5 20.7 1.2         |  |                      |  |                             |  |                                      |  | TRUE Can reject                 |  |                                      |  |  |  |
|           |         |          |          |          | 19.9 0.6 20.7 0.4         |  |                      |  |                             |  |                                      |  | FALSE Const. ext. err           |  |                                      |  |  |  |
|           |         |          |          |          | 19.9 0.6 20.8 0.7         |  |                      |  |                             |  |                                      |  |                                 |  |                                      |  |  |  |
|           |         |          |          |          | 19.9 0.6 20.9 0.3         |  |                      |  |                             |  |                                      |  |                                 |  |                                      |  |  |  |
|           |         |          |          |          | 19.9 0.8 21.1 0.7         |  |                      |  |                             |  |                                      |  |                                 |  |                                      |  |  |  |
|           |         |          |          |          | 20.0 0.6 21.2 0.5         |  |                      |  |                             |  |                                      |  |                                 |  |                                      |  |  |  |
|           |         |          |          |          | 20.0 0.8 21.8 0.7         |  |                      |  |                             |  |                                      |  |                                 |  |                                      |  |  |  |
|           |         |          |          |          | 20.0 0.6 22.6 0.4         |  |                      |  |                             |  |                                      |  |                                 |  |                                      |  |  |  |
|           |         |          |          |          | 20.0 0.5 23.1 0.9         |  |                      |  |                             |  |                                      |  |                                 |  |                                      |  |  |  |
|           |         |          |          |          | 20.1 0.9                  |  |                      |  |                             |  |                                      |  |                                 |  |                                      |  |  |  |
|           |         |          |          |          | 20.1 0.7                  |  |                      |  |                             |  |                                      |  |                                 |  |                                      |  |  |  |

[illegible]
