# Supplementary material
Source: publisher figshare collection journal article supplement (https://gsapubs.figshare.com/ndownloader/files/22411281)

# Rainbow Gardens Recreation Area

## RGRA 4 section J

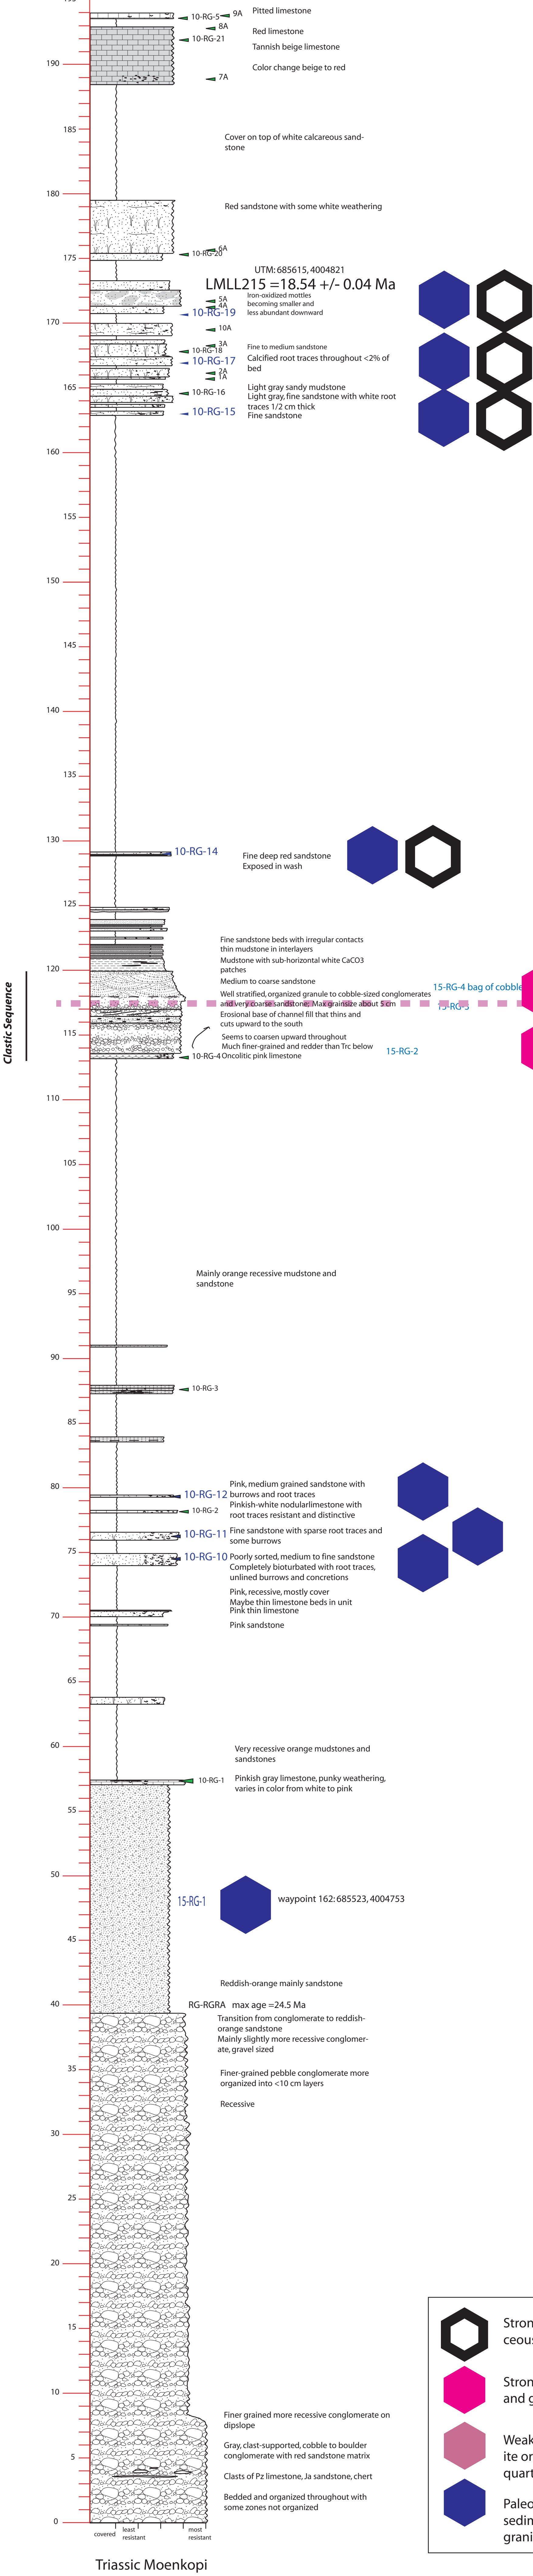

## RGRA 8 section K

(thickness determined by a combination of fieldwork and mapwork and thus is slightly less accurate than other purely measured sections)

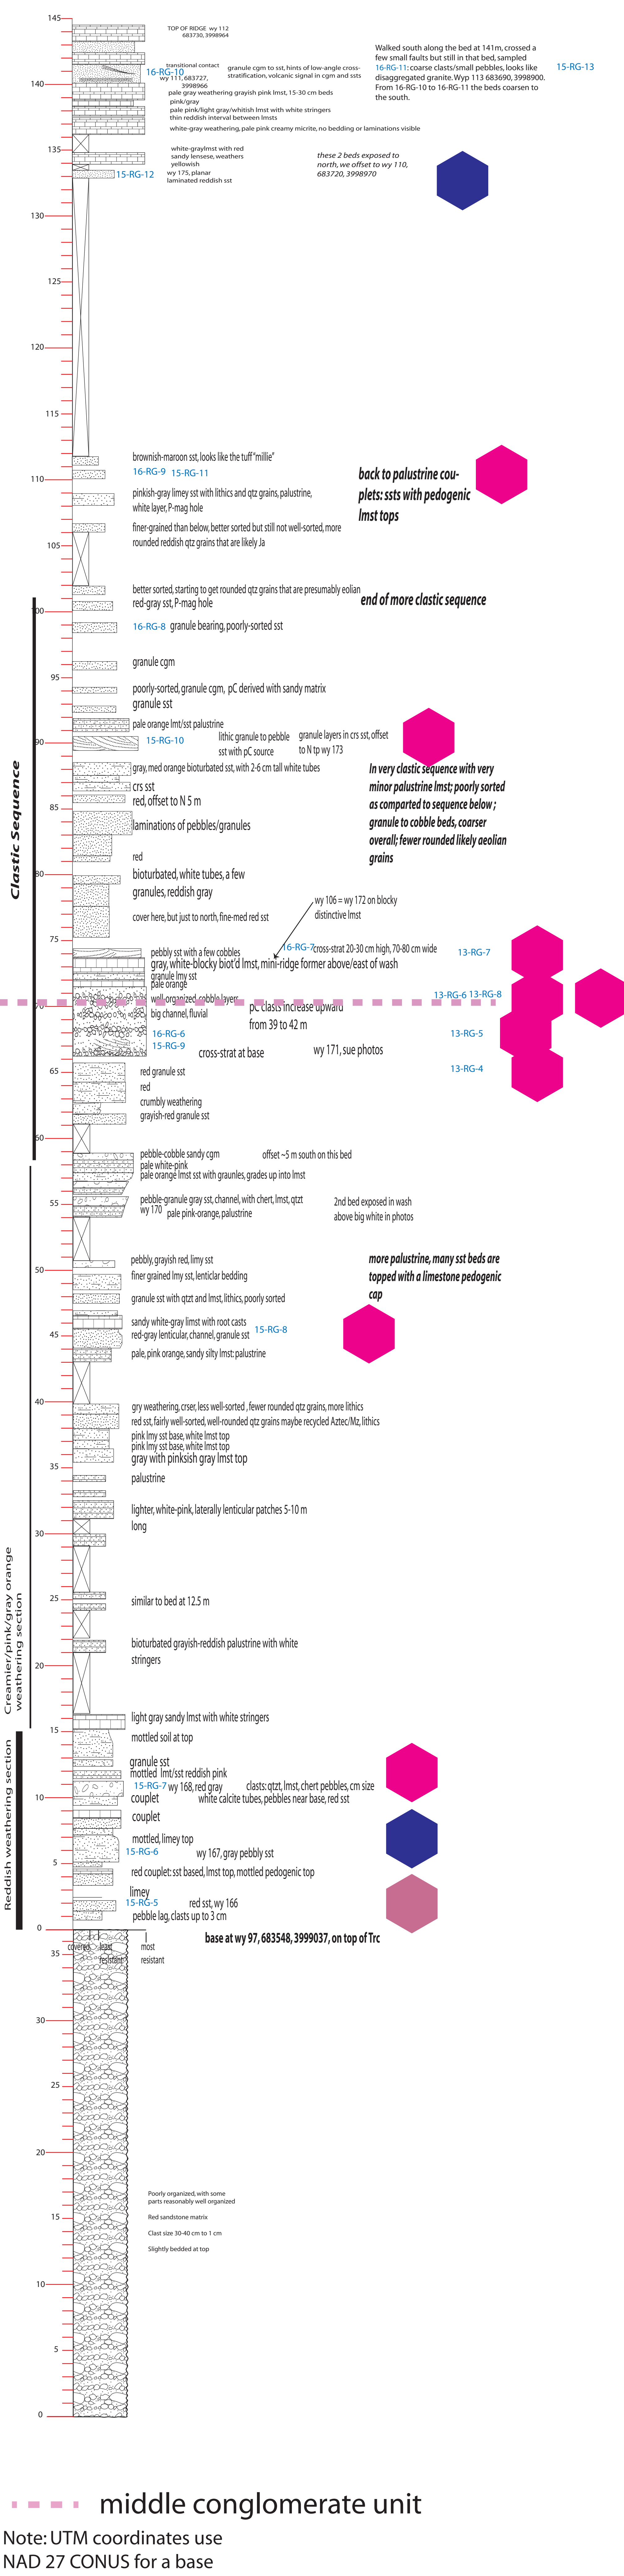

Supplement: Supplementary file 6 [file 22411281]
