# Supplementary material
Source: publisher figshare collection journal article supplement (https://gsapubs.figshare.com/ndownloader/files/22411281)
Supplement: Supplementary file 7 [file 22411281]

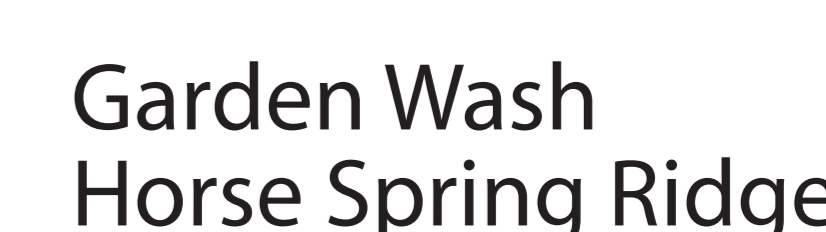

fault here

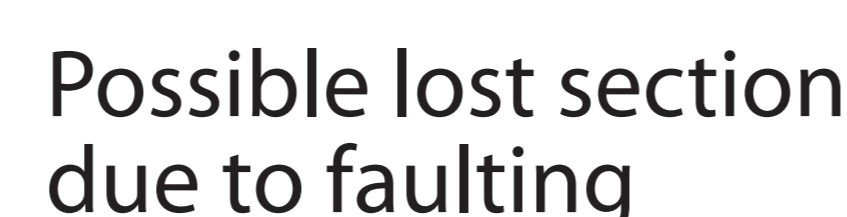

Possible lost section  
due to faulting

Possible lost section  
due to faulting

Possible lost section  
due to faulting

Base not exposed

Note: UTM coordinates use NAD 27 CONUS for a base

Base not exposed
