# Supplementary material
Source: publisher figshare collection journal article supplement (https://gsapubs.figshare.com/ndownloader/files/22411281)

# Tassi Wash

## Rainbow Gardens Fm section

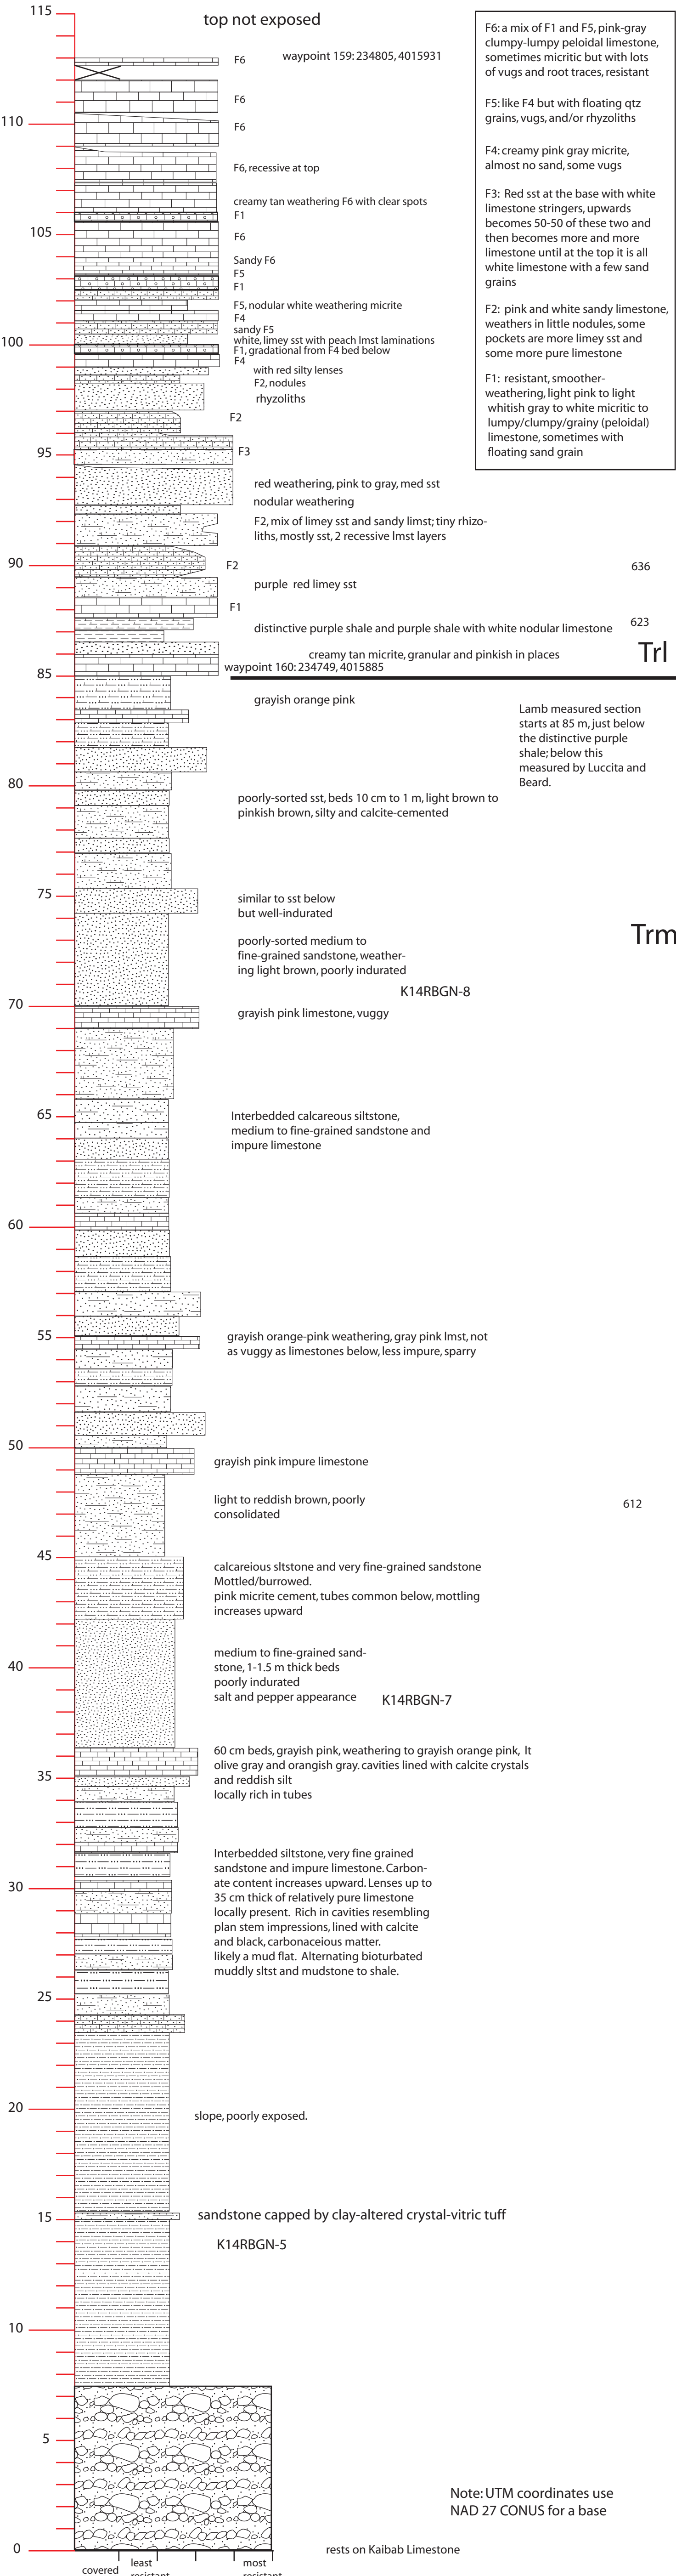

Supplement: Supplementary file 1 [file 22411281]
